1 **Assessment of Human Renal Transporter Based Drug-Drug Interactions Using Proximal**

2 **Tubule Kidney-Chip**

3 **Authors:**

4 Anantha Ram Nookala<sup>1</sup>, Janey Ronxhi<sup>2</sup>, Josiah Sliz<sup>2</sup>, Sauvear Jeanty<sup>2</sup>, Dimitris V. Manatakis<sup>2</sup>,

5 Sushma Jadalannagari<sup>2</sup>, Geraldine Hamilton<sup>2</sup>, Hyoungshin Park<sup>2</sup>, Yu He<sup>1</sup>, Mitchell Lavarias<sup>1</sup>,

6 Gang Luo<sup>1</sup>, Kyung-Jin Jang<sup>2\*</sup>, and Donald Mckenzie<sup>1\*</sup>

7 **Author Affiliations:**

8 <sup>1</sup>Labcorp Drug Development, 3301, Kinsman Blvd, Madison, WI, 53704 (ARN, YH, ML, GL,

9 DM)

10 <sup>2</sup>Emulate Bio, 27 Drydock Avenue, Boston, MA, 02210 (JR, JS, SJ, DVM, SJ, GH, HP, KJJ)

11

12 **Abstract**

13 Study of renal transporters is crucial for understanding drug disposition and toxicity, and more  
14 importantly, predicting potential drug-drug interactions (DDIs). However, conventional *in vitro*  
15 models often fail to predict renal transporter activity and are not scalable to a predictive clinical  
16 outcome due to *in vitro-in vivo* discrepancy. Here, we successfully developed a human Proximal  
17 Tubule Kidney-Chip model that emulated *in vivo* renal physiology and function to assess renal  
18 transporter-based DDIs. Active and improved functionality of key renal transporters including p-  
19 glycoprotein (P-gp), multidrug and toxin extrusion (MATE) 1 and 2-K, organic anion transporter  
20 (OAT) 1 and 3, and organic cation transporter (OCT) 2 were demonstrated using appropriate probe  
21 substrates in Kidney-Chips compared to transwell controls. Moreover, comparative transcriptomic  
22 analysis revealed that key efflux and uptake transporters were expressed significantly higher in the  
23 Kidney-Chip compared to the transwell. Additionally, key parameters obtained from substrate-  
24 inhibitor interactions in the model were used to predict clinical DDIs as well as clearance values,  
25 which were closer to *in vivo* clearances. Overall, these results support that the human Proximal  
26 Tubule Kidney-Chip can reliably assess the role of human renal transporters in drug disposition  
27 and drug interactions, providing a critical tool to assess renal transport *in vitro*.

28

## 29 **Introduction**

30 Renal elimination is an important clearance mechanism for more than 30% of the top 200  
31 prescribed drugs (Morrissey *et al.*, 2013). A variety of renal transporters contribute to the renal  
32 elimination of several exogenous and endogenous compounds by promoting tubular secretion and  
33 tubular reabsorption and thereby, play an important role in their disposition. Transporter activity  
34 can be modulated by multiple drugs resulting in the altered disposition, pharmacodynamic  
35 response, and development of nephrotoxicity due to drug accumulation (Yin and Wang, 2016).  
36 Nephrotoxicity alone accounts for 2% of drug development failures in the pre-clinical stage while  
37 rising to 19% in phase 3 clinical trials (Naughton, 2008; Tiong *et al.*, 2014). Much of the drug  
38 exposure occurs in the proximal tubule as many xenobiotics are secreted by the renal transporters  
39 expressed on their apical and basolateral surfaces (Ivanyuk *et al.*, 2017). Therefore, evaluation of  
40 a new chemical moiety as a victim and perpetrator of renal transporter-mediated drug-drug  
41 interactions (DDIs) is recommended by the regulatory agencies around the world, including the  
42 U.S. Food and Drug Administration and European Medicines Agency.

43 Currently, the widely used *in vitro* systems to study the renal transporter-mediated DDIs are human  
44 embryonic kidney 293 or Madin-Darby canine kidney (MDCK) cell lines that are transiently  
45 transfected with a relevant single transporter (Zhu *et al.*, 2012; Müller *et al.*, 2018). While these  
46 systems are useful to elucidate the role of specific transporter interactions, these are artificial  
47 systems overexpressing one specific transporter and cannot be utilized to study the combined effect  
48 of more than one transporter. Further, these systems require exhaustive *in vitro* experiments to  
49 correlate to *in vivo* interactions (Mathialagan *et al.*, 2017). They also lack the expression of several  
50 key phenotypic characteristics of renal proximal tubule epithelial cells (RPTECs), which are the  
51 prominent cell type within the kidney for drug transport. Within the kidney, RPTECs are exposed

52 to drug-related toxicities as they contain various transporters that accumulate the drugs inside the  
53 cells (Filipski *et al.*, 2009; Nigam *et al.*, 2015; Nieskens and Sjögren, 2019). Therefore, RPTECs  
54 are often considered as the gold standard for studying the renal transporter mediated DDIs and  
55 nephrotoxicity as they contain the full complement of the renal transporter expression and their  
56 gene expression profiles in culture are similar to the *in vivo* renal tissue, unlike the commonly used  
57 cell lines. However, RPTEC mRNA transporter expression decreases or is lost upon  
58 cryopreservation, and typically, is not restored in conventional 2D static culture models (Van der  
59 Hauwaert *et al.*, 2014). Different research groups have modified RPTECs to increase their capacity  
60 to expand in culture or increase their proliferation at a lower temperature without changing the  
61 functional characteristics (Wieser *et al.*, 2008; Wilmer *et al.*, 2010). Even though these modified  
62 RPTECs expressed some of the relevant influx and efflux transporters, they still lacked the  
63 expression and functional activity of organic anion transporter 1 (OAT1) and/or OAT3, two of the  
64 major drug transporters. Furthermore, RPTECs cultured in a 2D environment lack the expression  
65 of appropriate traditional toxicity markers (Li *et al.*, 2014), and do not maintain their characteristic  
66 polarized membrane structure (Rebelo *et al.*, 1992).

67 The apical surface of the RPTECs is under constant fluid shear stress from the glomerular filtrate  
68 which helps with polarization, cytoskeletal rearrangement, expression of apical and basolateral  
69 transporters, and localization of tight junction proteins *in vivo* (Duan *et al.*, 2008; Ferrell *et al.*,  
70 2019). Further, the interstitial space allows for the exchange of various solutes, amino acids, and  
71 glucose across the epithelium. Even though the current 2D transwell models allow for the study of  
72 bidirectional transport of various substances, it is speculated that the absence of shear stress to be  
73 the main reason for the lack of functional cell differentiation leading to the absence of transporter  
74 polarization in the current *in vitro* models. These shortcomings with the current *in vitro* models

75 warrant the need for a dynamic system that maintains the RPTECs' characteristic polarized  
76 membrane structure along with the transporter expression/function in culture in order to better  
77 model *in vivo* drug transport.

78 Several research groups have explored the potential of a dynamic microphysiological system that  
79 recapitulates the physiology and *in vivo* functions of the proximal tubule (DesRochers *et al.*, 2013;  
80 Vormann *et al.*, 2018). However, limitations occur with these models, including the inability to  
81 co-culture multiple cell types or the use of conditionally immortalized cell lines which limit the  
82 predictive ability of these models to *in vivo*. In the present study, a dynamic Proximal Tubule  
83 Kidney-Chip system was established using human microengineered Organ-on-Chip technology to  
84 emulate human physiology and accurately predict renal transporter-mediated DDIs.

## 85 **Results**

### 86 **Mimicking the proximal tubule microenvironment on Kidney-Chip**

87 A Proximal Tubule Kidney-Chip was fabricated to create a micro-engineered environment that  
88 recapitulates the proximal tubule section of the kidney. The chip was comprised of two fluidically  
89 independent top and bottom channels, separated by a porous polydimethylsiloxane (PDMS)  
90 membrane (7  $\mu\text{m}$  pore diameter, ~3% porosity) coated with ECM (Matrigel and collagen IV)  
91 (**Figure 1A**). RPTECs were seeded on the top channel at a density of  $2 \times 10^6$  cells/mL and renal  
92 microvascular endothelial cells (RMVECs) were seeded on the bottom channel at a density of  $1 \times$   
93  $10^6$  cells/mL under static conditions. The chips were connected to the pods that contained the  
94 RPTEC and RMVEC growth media with a flow rate of 60  $\mu\text{L}$ /hour.

95 Immunofluorescent staining and imaging were employed to visualize the confluency and  
96 polarization by determining the expression of aquaporin 1 (AQP-1), a principal water-transporting  
97 protein, and sodium-potassium ATPase ( $\text{Na}^+/\text{K}^+$ -ATPase) for the RPTECs and tight junction  
98 protein vascular endothelial (VE)-Cadherin for the RMVECs after 14 days in culture. The RPTECs  
99 exhibited expression of AQP-1 and uniform staining of  $\text{Na}^+/\text{K}^+$ -ATPase marker, indicating that  
100 the cells expressed RPTEC markers and formed a confluent monolayer (**Figure 1B**). Similarly,  
101 RMVECs showed a uniform and continuous staining of a tight junction protein VE-Cadherin,  
102 indicating that the cells formed a uniform and confluent monolayer for 2 weeks in culture (**Figure**  
103 **1B**). Retained dense monolayer of epithelium and endothelium was also shown by bright field  
104 images at 14 days in culture under continuous flow (**Figure 1B**).

### 105 **Comparative transcriptomic analysis of transporter gene expression in RPTECs cultured on** 106 **a Kidney-Chip and transwell**

107 Using RNA-sequencing (RNA-seq), we compared gene expression of the Proximal Tubule  
108 Kidney-Chips cultured under constant flow vs conventional static transwells (**Figure 2**).  
109 Differential gene expression (DGE) analysis was performed between the Kidney-Chips and  
110 transwells which were seeded using the same cell-type composition and subjected to the same  
111 experimental conditions for 14 days in culture. Out of the 57,500 genes annotated in the genome,  
112 3,717 were significantly differentially expressed. Among the 3,717 genes in the Kidney-Chip,  
113 1,839 were up-regulated and 1,878 were down-regulated compared to the transwell (**Figure 2B**).  
114 Pathway enrichment analysis was performed on the 1,839 up-regulated genes to identify the  
115 significantly enriched biological pathways in the Kidney-Chip samples using the Gene Ontology  
116 (GO) and Kyoto Encyclopedia of Genes and Genomes (KEGG) database resources. The analyses  
117 revealed functional gene sets that significantly clustered under 38 GO and 42 KEGG terms. Apart  
118 from kidney-relevant biological processes, these functional gene sets were related to other  
119 important biological processes including drug transport, drug metabolic process, fatty acid beta-  
120 oxidation, glucose transport, ion transport, oxidation-reduction process (**Figure 2B**). Particularly,  
121 efflux transporters including MDR1, MRP2, MRP4, MRP6 and uptake transporters including  
122 OAT1, OAT2, OAT3, OAT4, OATP4C1, OCT2, OCTN1, OCTN2, MATE1, and MATE2K were  
123 significantly higher expressed in the Kidney-Chip compared to the transwell (**Figure 2C**).  
124 Interestingly, efflux transporters which are not expressed in the kidney proximal tubule but instead  
125 are localized to the basolateral membranes of the limb of Henle and the distal tubule and collecting  
126 duct tubule cells, such as MRP1 and OATP4A1 had decreased expression in the Kidney-Chips  
127 compared to transwells (**Figure 2C**) (Masereeuw and Russel, 2012). Similarly, the expression  
128 levels of the efflux transporter MRP3, which is not expressed in the proximal tubule, was lower in  
129 Kidney-Chips compared to transwells but not statistically significant (**Figure 2C**). These findings

130 demonstrate that the RPTECs in the Kidney-Chip contain higher expression of key drug  
131 transporters and other kidney function pathways compared to transwell culture and may be a viable  
132 cell culture model to emulate DDIs *in vivo*.

### 133 **Comparison of transporter function in Proximal Tubule Kidney-Chip and transwell co-** 134 **culture**

135 The functional activity of various transporters on Day 14 post-seeding on Kidney-Chip and  
136 transwell was compared and shown in **Figure 3B and C**. Specific probe substrates used to evaluate  
137 the functional activity of transporters included <sup>3</sup>H-digoxin for P-gp, <sup>14</sup>C-TEA and <sup>14</sup>C-metformin  
138 for OCT2, MATE1, and MATE-2k activity, and <sup>14</sup>C-para-aminohippuric acid (PAH) and <sup>14</sup>C-  
139 adefovir for OAT1. The location of the transporters in the proximal tubule along with the direction  
140 in which the substrates are transported is presented in **Figure 3A**. Chips were dosed in either top  
141 channel/apical side (A) or bottom channel/basal side (B) under flow (Error! Reference source not  
142 found.).

143 **Digoxin:** The apparent permeability ( $P_{app}$ ) of <sup>3</sup>H-digoxin from A to B and B to A was  $\geq 2.21 \times 10^{-6}$   
144  $\text{cm}^2/\text{sec}$  and  $\geq 5.00 \times 10^{-6} \text{ cm}^2/\text{sec}$ , respectively in transwell;  $\geq 1.23 \times 10^{-6}$  and  $\geq 7.06 \times 10^{-6} \text{ cm}^2/\text{sec}$ ,  
145 respectively in Kidney-Chips. The efflux ratio of <sup>3</sup>H-digoxin was 5.76 in Kidney-Chip,  
146 approximately 2.5-fold of that in transwell (2.28).

147 **Metformin:** The  $P_{app}$  of <sup>14</sup>C-metformin from A to B and B to A was  $\geq 12.50 \times 10^{-6}$  and  $\geq 14.00 \times$   
148  $10^{-6} \text{ cm}^2/\text{sec}$ , respectively in transwell;  $\geq 3.87 \times 10^{-6}$  and  $\geq 13.20 \times 10^{-6}$ , respectively in Kidney-  
149 Chips. The efflux ratio of <sup>14</sup>C-metformin was 3.42 in Kidney-Chip, approximately 3-fold of that  
150 in transwell (1.12).



151 **TEA:** The  $P_{app}$  of  $^{14}\text{C}$ -TEA from A to B and B to A was  $\geq 11.90 \times 10^{-6}$  and  $\geq 13.20 \times 10^{-6}$  cm/sec,  
152 respectively in transwell;  $\geq 1.57 \times 10^{-6}$  and  $\geq 7.80 \times 10^{-6}$ , respectively in Kidney-Chips. The efflux  
153 ratio of  $^{14}\text{C}$ -TEA was 4.98 in Kidney-Chip, approximately 4.5-fold of that in transwell (1.11).

154 **PAH:** The  $P_{app}$  of  $^{14}\text{C}$ -PAH from A to B and B to A was  $\geq 7.40 \times 10^{-6}$  and  $\geq 10.10 \times 10^{-6}$  cm/sec,  
155 respectively in transwell;  $\geq 2.44 \times 10^{-6}$  and  $\geq 6.58 \times 10^{-6}$ , respectively in Kidney-Chips. The efflux  
156 ratio of  $^{14}\text{C}$ -PAH was 2.7 in Kidney-Chip, approximately 2.4-fold of that in transwell (1.13).

157 A similar trend was observed in Day 8 in culture for both transwell and chip groups, with slight  
158 increases of efflux ratio over time in the Kidney-Chip for all substrates (**Supplementary Figure**  
159 **3**). These results confirmed the transcriptomics data. These results also indicated that the key renal  
160 transporters P-gp, OCT2, MATE1, MATE2-k, and OAT1 were functionally active between Day  
161 8 and Day 14 in Kidney-Chip when the RPTECs and RMVECs were co-cultured on the Kidney-  
162 Chip, whereas only P-gp was active to some extent and rest renal transporters were inactive in the  
163 transwell. Altogether the data suggest that the Proximal Tubule Kidney-Chip performs key  
164 functions of *in vivo* kidney drug transport.

#### 165 **Prediction of clearance from Kidney-Chip and Transwell efflux ratio**

166 To better understand if the Proximal Tubule Kidney-Chip could predict drug transport *in vivo*,  
167 transporter data obtained in the absence of inhibitors including efflux ratios, predicted clearance,  
168 *in vivo* clearance cited from literature reports, and contribution of distal tubule reabsorption to  
169 kidney clearance are summarized in **Table 1**. Renal clearance obtained clinically or predicted  
170 from Kidney-Chip and Transwell are presented graphically in **Figure 4**.

171 Compared with the *in vivo* clearance, the clearance predicted from transwell was 164% for digoxin,  
172 25% for metformin, and 25% for PAH, whereas the clearance predicted from Kidney-Chip was

173 85% for adefovir, 434% for digoxin, 64% for metformin, and 72% for PAH. Much higher *in vitro*  
174 clearance for digoxin in Kidney-Chip was likely due to the model lacking distal tubule  
175 reabsorption which markedly reduces *in vivo* clearance. Slightly lower *in vitro* clearances for  
176 adefovir, metformin, and PAH might be due to lower transporter activities in the *in vitro* models  
177 or due to the interindividual differences in the transporter activities. Significantly, the clearances  
178 predicted from Kidney-Chip for adefovir, metformin, and PAH were closer to *in vivo* clearances  
179 and much better than those predicted from transwell.

### 180 ***In vitro* Renal Transporter Mediated DDI:**

181 As various drugs are shown to affect the secretion of certain xenobiotics across the RPTECs by  
182 inhibiting the transporter function resulting in drug-drug interaction we wanted to test if the  
183 Kidney-Chip model would show similar interactions. In the Kidney-Chip model, the tested  
184 transporters were shown to be functionally active between Day 8 and Day 14; accordingly, various  
185 renal transporter mediated DDI experiments were performed between Days 8 and 14.

186 ***Digoxin-Quinidine DDI:*** Quinidine (1, 5, and 25  $\mu\text{M}$ ) inhibited P-gp-mediated transport of  
187 digoxin (1  $\mu\text{M}$ ) in a concentration-dependent manner (**Figure 5A**). The efflux ratio was  
188 approximately 1 at 25  $\mu\text{M}$  quinidine. An  $\text{IC}_{50}$  value was estimated to be 0.723  $\mu\text{M}$ .

189 ***TEA-Cimetidine DDI:*** Cimetidine (5, 25, and 100  $\mu\text{M}$ ) inhibited OCT2- and MATEs-mediated  
190 transport of TEA (1  $\mu\text{M}$ ) in a concentration-dependent manner (**Figure 5B**). The efflux ratio was  
191 approximately 1 at 100  $\mu\text{M}$  cimetidine. The  $\text{IC}_{50}$  value was estimated to be 3.16  $\mu\text{M}$ .

192 ***Metformin-Cimetidine DDI:*** Cimetidine (5, 25, and 100  $\mu\text{M}$ ) also inhibited OCT2- and MATEs-  
193 mediated transport of metformin (1  $\mu\text{M}$ ) in a concentration-dependent manner (**Figure 5C**). The

194 efflux ratio was approximately 1 at 100  $\mu\text{M}$  cimetidine. The  $\text{IC}_{50}$  value was estimated to be 4.41  
195  $\mu\text{M}$ .

196 ***PAH-Probenecid DDI:*** Probenecid (10, 50, and 200  $\mu\text{M}$ ) inhibited OAT1-mediated transport of  
197 PAH (1  $\mu\text{M}$ ) in a concentration-dependent manner (**Figure 5D**). The efflux ratio was  
198 approximately 1 at 200  $\mu\text{M}$  probenecid. The  $\text{IC}_{50}$  value was estimated to be 6.71  $\mu\text{M}$ .

199 ***Adefovir-Probenecid DDI:*** Probenecid (10, 50, and 200  $\mu\text{M}$ ) inhibited OAT1-mediated transport  
200 of adefovir (1  $\mu\text{M}$ ) in a concentration-dependent manner (**Figure 5E**). The efflux ratio was  
201 approximately 1 at 200  $\mu\text{M}$  probenecid. The  $\text{IC}_{50}$  value was estimated to be 12.5  $\mu\text{M}$ .

202 All the  $\text{IC}_{50}$  values estimated above can be taken to approximate the inhibition constant ( $K_i$ ) as all  
203 the probe substrates were used well below its transport Michaelis-Menten Constant ( $k_m$ ). These  
204 results indicated that DDIs mediated by key renal transporters can be studied using this Proximal  
205 Tubule Kidney-Chip model.

#### 206 **Simulation of Clinical DDI Studies:**

207 Clinical pharmacokinetics of digoxin, metformin, and adefovir were simulated using a one-  
208 compartment clearance model. The simulation was performed for each drug in the absence and  
209 presence of respective inhibitors (**Figure 6A, B, and C**). Subsequently, clinical impact (CI) was  
210 calculated for each DDI (**Table 2**). Predicted CI was also calculated based on the results obtained  
211 from Kidney-Chip model (**Table 2**). Inhibition studies in transwell were not performed and no  
212 comparison to *in vivo* was attempted since the transwell data was not suitable for this analysis.  
213 Indeed, because the efflux ratios were low, no significant difference was expected between the  
214 predicted uninhibited and completely inhibited case, but rather both predictions would be primarily  
215 dominated by glomerular filtration.

216 Importantly, while model-generated concentration profiles are shown with time for metformin  
217 adefovir, and digoxin, the absolute values may be skewed due to either under-prediction or over-  
218 prediction of kidney clearance (see **Table 1** for level of over/underprediction). For example,  
219 digoxin clearance is over-predicted from Kidney-Chip efflux ratios, likely due to the contribution  
220 of distal tubule reabsorption in minimizing total excretion *in vivo*. While this does result in an  
221 over-prediction of clearance, it does not result in skewing of predicted *shifts* in clearance due to  
222 inhibition, since distal tubule reabsorption is dependent on the fraction reabsorbed relative to the  
223 summation of glomerular clearance and proximal tubule secretion clearance. Thus, so long as  
224 estimates of glomerular and proximal tubule secretion are correct, inhibition of proximal tubule  
225 secretion will result in the same shift in clearance and area under the  $C_p$  curve regardless of whether  
226 distal tubule reabsorption is correctly estimated.

227 ***Digoxin-Quinidine DDI (Figure 6A):*** We modeled a clinical DDI study examining the effects of  
228 quinidine inhibition of digoxin active transport on the clearance of digoxin from systemic blood  
229 circulation. The study consisted of an 8-day oral dosing regimen, with digoxin being administered  
230 either alone, once daily for 8 days at 0.4 mg/dose or co-administration with quinidine twice daily  
231 at 600 mg/dose for 8 days, in a random crossover study design (Rameis, 1985). Clinical results  
232 were reported for the observed shift in total clearance and shift in Area Under the Curve (AUC)  
233 for a population of 6 healthy volunteers. The clearance model predicted a decrease in total kidney  
234 clearance of 59% due to quinidine inhibition, with the model run using the  $C_{ss}$  of quinidine. This  
235 compared well to the clinically observed decrease in total clearance of 54%. AUC was predicted  
236 to increase by a very appreciable 128%, which was in line with observed clinical values, where  
237 AUC increased by an average of 166%. As can be seen in Figure 6A, with multiple doses,

238 circulating digoxin concentration increases further from the uninhibited case as time progresses  
239 and additional doses are administered, which further increases the exposure or AUC.

240 An additional four clinical DDI studies were modeled for digoxin-quinidine DDI, each following  
241 a similar experimental design (results not shown in Figure 6) (Hager *et al.*, 1981; Ochs *et al.*, 1981;  
242 Fenster *et al.*, 1984). The studies each consisted of an initial single 1 mg IV dose of digoxin to  
243 assess uninhibited clearance in the subjects, followed by between 4 and 11 days of exposure to  
244 quinidine via 4X daily oral administration of 200 mg tablets, followed by another single 1mg IV  
245 dose of digoxin. Clinical results were only reported for the observed shift in total clearance for a  
246 population of between 6 and 7 healthy volunteers, depending on the study. The clearance model  
247 predicted a decrease in total kidney clearance of 46 % due to quinidine inhibition, with the model  
248 run using the  $C_{ss}$  of quinidine. This compared well to the average clinically observed decrease in  
249 total clearance of also 46 %, indicating very good agreement between the model and clinical  
250 results.

251 ***Metformin-Cimetidine DDI (Figure 6B):*** We modeled a clinical DDI study examining the effects  
252 of cimetidine inhibition of metformin active transport on the clearance of metformin from systemic  
253 blood circulation (Somogyi *et al.*, 1987; Wang *et al.*, 2008). The study consisted of a 10-day oral  
254 dosing regimen, with metformin being administered alone, twice daily for 5 days at 250 mg/dose,  
255 followed by co-administration of metformin with cimetidine for another 5 days, which was also  
256 administered twice daily at 400 mg/dose. Clinical results were reported for the observed shift in  
257 total clearance and shift in AUC for a population of 7 healthy volunteers. The clearance model  
258 predicted a decrease in total kidney clearance of between 20 – 38% due to cimetidine inhibition,  
259 depending on whether the model was run using cimetidine concentration at steady-state ( $C_{ss}$ ) or  
260 peak circulating concentration ( $C_{max}$ ). This compared well to the clinically observed decrease in

261 total clearance of 27%. Similarly, AUC was predicted to increase by between 26 – 60% and was  
262 observed to increase in the clinical setting by an average of 50%, indicating good agreement  
263 between the model and clinical results.

264 ***Adefovir-Probenecid DDI (Figure 6C):*** We also modeled a clinical DDI study examining the  
265 effects of probenecid inhibition of adefovir active transport on the clearance of adefovir from  
266 systemic blood circulation (Maeda *et al.*, 2014). The study consisted of a single day oral co-dose  
267 of probenecid at 10mg and adefovir at 1500 mg. Clinical results were reported for the observed  
268 shift in total clearance and shift in AUC for a population of 6 healthy volunteers. The clearance  
269 model predicted a decrease in total kidney clearance of 39% due to probenecid inhibition, with the  
270 model run using the peak circulating probenecid concentration ( $C_{max}$ ), as a concentration at steady-  
271 state cannot be computed for single dosage regimen. The shift in clearance in the clinical setting  
272 was not reported for this study. AUC was predicted to increase by 64% and was observed to  
273 increase in the clinical setting by an average of 82%, indicating good agreement between the model  
274 and clinical results.

275 Overall, we observed a good agreement with simulations obtained using the parameters from the  
276 Kidney-Chip compared to the literature values for digoxin, metformin, and adefovir. These results  
277 also indicated that the one compartmental clearance model was adequate for predicting the clinical  
278 pharmacokinetics (clearance and AUC) of digoxin, metformin, and adefovir in the presence and  
279 absence of inhibitors.

280

281

282

## 283 **Discussion**

284 The kidney is an organized tissue comprised of different cell types surrounded by intricate  
285 capillary networks and extracellular matrix. Various cell lines routinely used to study the  
286 transporter mediated drug interactions and drug induced nephrotoxicity are of non-human origin  
287 and are utilized in conventional 2D models without fluid flow (Wilmer *et al.*, 2016). Given the  
288 limitations of culturing primary epithelial cells on a 2D model, there is a need to develop a kidney  
289 microphysiological systems (MPS) that recapitulates the dynamic environment, structure and  
290 function of kidney *in vivo*. Previously, several groups have developed bioengineered 3D kidney  
291 tissue models to study renal transport, nephrotoxicity, and drug interactions (Humes *et al.*, 1999;  
292 DesRochers *et al.*, 2013; Vormann *et al.*, 2018). However, the use of immortalized cell lines or  
293 inability to co-culture is a limitation of these models. Our model overcomes these limitations to  
294 successfully co-culture primary RPTECs and RMVECs exposed to unidirectional flow on both  
295 sides emulating the dynamic microenvironment of proximal tubule of the kidney in the  
296 microfluidic chip system.

297 Fluid shear stress regulates the expression of tight junction proteins on epithelial cells which  
298 restrict the leakage of solutes, amino acids, glucose, and nutrients (Maggiorani *et al.*, 2015). The  
299 RPTECs and RMVECs of Kidney-Chip cultured under fluid shear stress retained their  
300 characteristic morphology with the localization of tight junction proteins for the entire culture  
301 duration (Duan *et al.*, 2008). Fluid shear stress induced phenotypic polarization of the epithelial  
302 cells was confirmed by staining for Na<sup>+</sup>/K<sup>+</sup>-ATPase and P-gp on the basolateral and apical  
303 surfaces, respectively. In contrast, the cells cultured on a conventional 2D transwell condition do  
304 not retain the characteristic cuboidal morphology and have leaky junctions (Hoppensack *et al.*,  
305 2014). Numerous cilia extending into the lumen on the surface of the RPTECs play important roles

306 in calcium signaling, endocytosis, and mechanosensing (Pazour and Witman, 2003; Raghavan *et*  
307 *al.*, 2014). We previously used immunocytochemistry and scanning electron microscopy analysis  
308 to demonstrate the expression of primary cilia on the surface of RPTECs (Jang *et al.*, 2013). One  
309 of the important functions of the proximal tubule is reabsorption of serum albumin secreted into  
310 the glomeruli through megalin- and cubulin-mediated endocytosis (Merlot *et al.*, 2014) (Zhai *et*  
311 *al.*, 2000; Nielsen *et al.*, 2016). We also previously reported that RPTECs cultured on the Kidney-  
312 Chip under fluid shear stress retained the apical endocytic capacity by quantifying the uptake of  
313 FITC-labeled albumin (Jang *et al.*, 2013).

314 RPTECs mediate the transfer of endogenous and exogenous compounds from lumen to blood or  
315 blood to lumen through functionally distinct apical and basolateral membrane transporters  
316 (International Transporter Consortium *et al.*, 2010). To date, there are only few *in vitro* models  
317 that recapitulate the kidney structure and function *in vitro* (Maggiorani *et al.*, 2015; King *et al.*,  
318 2017). However, none of the models have completely characterized the expression of renal drug  
319 transporters and their potential to assess drug-drug interactions. Previously, research groups have  
320 indicated that fluid shear stress can increase the expression of transporters in mouse proximal  
321 tubule cells (Wang *et al.*, 2017) or MDCK cell line cultured in microfluidic biochip for up to 96  
322 hours (Snouber *et al.*, 2012). Our transcriptomic analysis showed that fluid shear stress induced  
323 significant changes in the gene expressions of various transporters and enzymes involved in  
324 various physiologic and metabolic functions. Compared to the RPTECs and RMVECs cultured on  
325 a conventional transwell, we observed a significant upregulation in the expression of several key  
326 transporters, including P-gp, OAT1/3, MRP2/4, OCT2, and OCT2 when cultured on the Kidney-  
327 Chip.



328 Given the transcriptome analysis, we compared the functional activity of various transporters in  
329 Kidney-Chip to the transwell control. Except for P-gp, the functional activity of various  
330 transporters was absent in RPTECs cultured on the transwell plate. The flow retained the functional  
331 activity of various transporters in the Kidney-Chip as demonstrated by the uptake and directed  
332 efflux of several probe substrates. We also confirmed dose-dependent drug interactions with  
333 various transporters using the regulatory agency recommended probe substrates and inhibitors.  
334 There has been some limited research regarding the effect of fluid flow on the functionality of  
335 renal transporters; P-gp and MRP2/4 in immortalized PTECs (Vriend *et al.*, 2020), OAT1/3 in  
336 human PTECs (Weber *et al.*, 2016), OAT in porcine PTECs (Humes *et al.*, 1999), and  
337 OCT2/MATE1 in transfected MDCK cells (Jayagopal *et al.*, 2019). However, none of these  
338 models have adequately characterized the functional activity of all the relevant human renal  
339 transporters within a single model and have not utilized the co-culture of epithelial and endothelial  
340 cells which is a closer representation of kidney tubular environment *in vivo*. Further, some of these  
341 models used cells from non-human origin or immortalized cells that makes the extrapolation to  
342 human *in vivo* data difficult.

343 As a demonstration of the Kidney-Chip's utility to predict clinically relevant DDI outcomes, we  
344 used the results from the Kidney-Chip dose-dependent DDI studies to model the impact of *in vivo*  
345 administration of prototypic inhibitors on the rate of elimination and total exposure to co-  
346 administered substrates of proximal tubule active transport. When following the same dosing  
347 regimen as outlined in clinical studies, we were able to accurately predict shifts in clearance and  
348 AUC for the three victim/perpetrator combinations for which clinical data was available from the  
349 University of Washington Drug Interaction Database. These clinically relevant parameters were  
350 confirmed for metformin-cimetidine and adefovir-probenecid in a repeat-dose and single-dose

351 regimen, respectively, and for digoxin-quinidine in both a single-dose and repeat-dose regimen  
352 study design. Altogether, our data suggests that the Kidney-Chip model more accurately predicts  
353 *in vivo* drug clearance than other *in vitro* kidney models.

354 Future work will, in part, focus on adding additional complexity to the computational models used  
355 to support extrapolation of Kidney-Chip data to *in vivo* parameters/clinical outcomes to better  
356 predict *in-vivo* results. Specifically, the one-compartment clearance model could be expanded to a  
357 multi-compartment physiologically-based pharmacokinetic model to capture important compound  
358 kinetics such as elimination of compound from other clearance pathways such as liver metabolism.  
359 Incorporation of these other clearance mechanisms would improve the direct applicability of  
360 model estimations of clearance and, consequently, the direct applicability to decisions in the  
361 clinical setting without needing to consider non-renal clearance mechanisms separately. For the  
362 compounds evaluated here, kidney clearance was the major route of compound elimination from  
363 the body and incorporation of liver clearance, for example, was not necessary (Goodman *et al.*,  
364 2011).

365 Additional complexity could also be beneficial to the approach used to extrapolate *in vitro* efflux  
366 ratios to *in vivo* clearances (Scotcher *et al.*, 2016). For example, with the current extrapolation  
367 procedure, the contribution of distal tubule reabsorption is not considered quantitatively, instead  
368 only indicated whether the compound is known to reabsorb appreciably. Further modeling is  
369 required to appropriately capture the time-dependent nature of reabsorption, incorporate the  
370 differences in kidney physiology seen in the population, including differences in diet, which can  
371 cause a range in pH from 4.5 – 8.0 within the tubule and contribute to the extent of the equilibrium  
372 condition achieved before filtrate enters the collecting ducts. Tubule pH can dramatically affect  
373 ionization of compound within the tubule and, therefore, the driving-force or extent of reabsorption

374 (Scotcher *et al.*, 2016; Mathialagan *et al.*, 2017). For the compounds examined in these studies,  
375 only digoxin is known to be extensively reabsorbed in the distal tubule and thus only digoxin  
376 clearance was over-estimated with this approach. Albeit, even in the case of digoxin, decreases in  
377 clearance and increases in AUC due to inhibition could be well predicted since shifts in clearance  
378 (in terms of percent change) are not impacted by the absolute value of fraction reabsorbed  
379 incorporated in the model. Nonetheless, future work is needed to create a more complete  
380 physiologically-based model of the proximal tubule and distal tubule, which incorporates the  
381 development of gradients along the length of tubule and will improve the power of the model by  
382 enabling more accurate and robust prediction of *in vivo* clearance, as opposed to the current  
383 approach which only assesses upper and lower limits.

384 Despite the current use of classic computational models, Kidney-Chip modeling is able to give a  
385 better quantitative prediction of *in-vivo* DDIs in the clinical setting and an important improvement  
386 over the estimation of uninhibited clearance in comparison to transwell. Expected shifts in  
387 clearance and AUC due to DDIs in the clinical setting were predicted well by leveraging Kidney-  
388 Chip victim-perpetrator dose-response data and simple/classical computational models.  
389 Information such as this would be of extreme value for quantitatively assessing the impact of DDIs  
390 on novel pharmaceutical exposure. Shifts in exposure can have important clinical outcomes,  
391 especially in the case of multi-dose regimen, where a significant increase in the AUC is possible  
392 and the risk of chronic toxicity amplified. The Kidney-Chip appears well-positioned to fill the  
393 niche of quantifying the severity of DDI risk and defining concentrations of inhibitor and particular  
394 dosing regimen where these DDIs will be important.

395 In summary, we have developed and shown for the first time a microphysiological system that  
396 emulates the proximal tubule portion of the kidney to study renal transporter mediated DDIs. The

397 clinical pharmacokinetic parameters obtained from the Kidney-Chip were close to the clinical  
398 outcomes, markedly improving prediction of *in vivo* outcomes compared to the current standard  
399 of transwells.

400

401

402

403 **Materials and methods**

404 **Materials:**  $^{14}\text{C}$ -Adefovir,  $^3\text{H}$ -digoxin,  $^{14}\text{C}$ -metformin,  $^{14}\text{C}$ -para-aminohippuric acid, and  $^{14}\text{C}$ -  
405 tetraethyl ammonium were purchased from American radiolabeled chemicals (St. Louis, MO).  
406 Cimetidine, probenecid, quinidine, and collagen IV were purchased from Millipore Sigma (St.  
407 Louis, MO). Heat inactivated fetal bovine serum (HI FBS) and trypan blue were procured from  
408 Gibco Life Technologies (Waltham, MA). Cryopreserved primary human RPTECs (donor lot CC-  
409 2553, female, 44 years old), REBM renal epithelial cell growth basal medium, REGM single quot  
410 kit, and amphotericinB/gentamycin were procured from Lonza (Basel, Switzerland).  
411 Cryopreserved primary RMVECs (donor lot 128.02.01.02.0R, pooled), CSC basal medium, and  
412 culture boost were procured from cell systems (Kirkland, WA). Matrigel, DPBS, and transwell  
413 plates were purchased from corning (Corning, NY).

414 **Cell culture:** RMVECs were cultured in CSC basal medium supplemented with culture boost, HI  
415 FBS, and amphotericin B/gentamycin. RPTECs were cultured in REBM renal epithelial cell  
416 growth basal medium supplemented with human epidermal growth factor, insulin, hydrocortisone,  
417 transferrin, human triiodothyronine, human epinephrine, HI FBS, and amphotericin B/gentamycin.  
418 Cells were maintained in an incubator at  $37^\circ\text{C}$ , 5%  $\text{CO}_2$  and saturated humidity for 4 days before  
419 plating into extracellular matrix (ECM) coated chips or transwell plates.

420 The chips (S-1 Chips, Emulate Inc.) were activated with a proprietary ER-1 solution (Emulate Inc.)  
421 under UV light for 15 minutes. The chips were incubated overnight at  $37^\circ\text{C}$  with ECM mixture  
422 containing collagen IV ( $50\ \mu\text{g}/\text{mL}$ ) and matrigel ( $100\ \mu\text{g}/\text{mL}$ ). RMVECs were plated into the  
423 bottom channel at a density of  $2 \times 10^6$  cells/mL and the chips were inverted for 3 hours to facilitate  
424 attachment to the porous membrane that separates the two parallel channels in the chip. The chips  
425 were flipped back to the upright position, followed by the addition of RPTECs into the top channel

426 at a density of  $1 \times 10^6$  cells/mL. A gentle gravity wash with the fresh media was performed after  
427 the cells have fully attached (approximately 3 hours post-seeding) to ensure that nutrients were  
428 replenished. Following day, the cells were appropriately washed with the medium and were  
429 connected to the Pods and Human Emulation System (Emulate Inc.). The flow rate was set to 60  
430  $\mu\text{L}/\text{hour}$  for the top and bottom channels. The medium was appropriately replenished for the  
431 duration of the experiment.

432 A parallel experiment using co-cultured transwell control (polyester membrane, pore size  $0.4 \mu\text{m}$ )  
433 was conducted to investigate flow effect on RPTEC function in the Kidney-Chip. RMVECs were  
434 suspended in CSC media at a density of  $0.5 \times 10^6$  cells/mL. The transwell insert was inverted and  
435  $100 \mu\text{L}$  of the cell suspension was added to the surface of each transwell insert. After 3 hours, the  
436 transwell was reverted to its original position. RPTECs were suspended in REBM media at a final  
437 density of  $0.5 \times 10^6$  cells/mL and  $200 \mu\text{L}$  of the cell suspension was added to each well of the  
438 transwell plate. The monolayers were maintained at  $37^\circ\text{C}$  in an atmosphere of 5%  $\text{CO}_2$  with  
439 saturated humidity for up to 14 days. During this culture period, the medium was replaced at least  
440 three times each week.

441 **Transport studies using chips:** Apparent permeability ( $P_{\text{app}}$ ) was experimentally derived in the  
442 apical (top channel) to basolateral (bottom channel) and basolateral to apical directions  
443 (**Supplementary Figure 1**). Following 8 days of culture, culture medium was aspirated from the  
444 donor channel inlet compartment and replaced by a substrate solution ( $1 \mu\text{M}$  for all the substrates  
445 and  $5 \mu\text{M}$  for TEA) in supplemented CSC basal medium or supplemented REBM medium,  
446 depending on the direction permeability being assessed. For the inhibitor experiments, the  
447 inhibitors were dosed in both the top and bottom compartments for 1 hour at a flow rate of 80  
448  $\mu\text{L}/\text{hour}$  prior to the addition of the substrate. The total organic solvent contribution to the

449 incubation was 1% (v/v) to avoid any cytotoxicity. After aspiration of the inhibitor pre-treatment  
450 medium and replacement with the dosing medium, the flow rate was increased to 600  $\mu$ L/hour for  
451 10 minutes to flush the channels. All media was aspirated from the outlet / collection reservoirs  
452 and the flow was reduced to 80  $\mu$ L/hour to initiate the transport study. The incubation was  
453 conducted at 37°C for 3 hours and terminated by the collection of the donor and receiver samples  
454 in the outlet reservoirs. The samples were analyzed by liquid scintillation counter (LSC) or liquid  
455 chromatography-mass spectrometry (LC-MS/MS) to determine the concentration of probe  
456 substrates, in comparison to the dosed.

457 Prior to commencing these studies, loss of compound to the system components due to absorption  
458 and adsorption was characterized (**Supplementary Figure 2**). None of the 5 compounds evaluated  
459 absorbed or adsorbed significantly into the chip material.

460 **Transport studies using transwell:**  $P_{app}$  was determined in the apical to basolateral and  
461 basolateral to apical directions. Following 8 and 14 days of culture, culture medium was aspirated,  
462 followed by the addition of substrate solution (1  $\mu$ M for all the substrates and 5  $\mu$ M for TEA) in  
463 the corresponding donor compartments to initiate the transport study. The incubation was  
464 conducted at 37°C for 2 hours and terminated by the collection of the donor and receiver samples.  
465 The samples were analyzed by LSC or LC-MS/MS to determine the concentration of probe  
466 substrates.

467 **LC-MS/MS:** A Sciex Triple Quad™ 5500 LC-MS/MS system in positive ion mode was used to  
468 analyze the concentrations of non-radiolabeled substrates (AB Sciex, Framingham, MA). Liquid  
469 chromatography was conducted using Shimadzu (Kyoto, Japan) system controller (CBM-20A),  
470 pumps (LC-30AD), autoinjector (SIL-30AC), Acquity® UPLC BEH C18 column (2.1 x 50 mm;  
471 1.7  $\mu$ M) (Waters, Milford, MA). Compounds were eluted in a linear gradient mobile phase mixture

472 consisting of 0.1% formic acid in water (mobile phase A) and 0.1% formic acid in acetonitrile  
473 (mobile phase B).

474 **RNA-seq Analysis:** Total RNA was isolated from cells in the Kidney-Chip (4 individual samples  
475 obtained on Day 14) and transwells (4 samples obtained on Day 14) using buffer RLT plus and  
476 RNeasy<sup>®</sup> Mini Kit (Qiagen, Hilden, Germany) according to the manufacturer's protocol. The  
477 extracted RNA was analyzed using the Illumina<sup>®</sup> HiSeq<sup>®</sup> 4000 platform with maximum read  
478 length 2x150 bp paired-end.

479 The sequencing depth was ~50M paired-end reads/sample. The average quality score was >35 for  
480 all samples. The Trimmomatic v.0.36 was used to trim the sequence reads to remove the poor-  
481 quality sequences and nucleotides. The trimmed reads were mapped to the Homo sapiens reference  
482 genome GRCh38 (available on ENSEMBL) using the STAR (Spliced Transcripts Alignment to a  
483 Reference) aligned v.2.5.2b. The generated BAM files were used to calculate the unique gene hit  
484 counts using the feature counts from the Subread package v1.5.2 Notably; only unique reads that  
485 fell within the exon regions were counted.

486 With exclusion of those poorly expressed genes across all samples, DGE analysis was performed  
487 between the two groups (Kidney-Chip cells and transwell cells) using the "DESeq2" R package  
488 by Bioconductor. Widely accepted threshold (adjusted p-value <0.01 and |log<sub>2</sub>FoldChange| > 1.6)  
489 was applied to the DGE analysis (Love *et al.*, 2014).

490 **KEGG pathway analysis and GO term enrichment analysis:**

491 The 1,839 up-regulated genes in Kidney-Chips were used to run KEGG pathway analysis and  
492 Gene Ontology (GO) enrichment analysis. Both analyses were performed using the popular  
493 Database for Annotation, Visualization and Integrated Discovery (DAVID) v6.8



494 (<https://david.ncifcrf.gov/home.jsp>) (Huang *et al.*, 2009a; b) (Ashburner *et al.*, 2000; Kanehisa  
495 and Goto, 2000).

#### 496 **Immunocytochemistry:**

497 The cells in the chips were fixed with 4% paraformaldehyde in PBS and incubated for 30 minutes  
498 at room temperature, which was followed by incubation with a permeabilization buffer composed  
499 of 0.125% Triton X-100 in PBS for 10 minutes. The cells were then blocked with solution  
500 containing 10% goat serum and 2% BSA in PBS for 1 hour at room temperature. The primary  
501 antibodies were added to cells and incubated overnight at 4°C, followed by incubation with  
502 secondary antibodies for 1 hour at room temperature. The cells were counterstained with Hoechst-  
503 33324 (Thermo Fisher, Waltham, MA). The primary antibodies used in this study were AQP-1  
504 (Abcam, ab15080), sodium potassium ATPase (Abcam, ab7671), and vascular endothelial (VE)-  
505 Cadherin (Thermo Fisher, BS-0878R).

#### 506 **Determination of Permeability and Inhibition Potency**

507 Apparent permeability ( $P_{app}$ ) was assessed using methods described previously for static culture  
508 systems (Tran *et al.*, 2004; Heikkinen *et al.*, 2010) with adaptations for a flow-based system:

$$509 \quad P_{app} = \frac{C_R * Q_R}{SA * C_D}$$

510 where  $P_{app}$  is the apparent permeability in units of cm/s,  $SA$  is the surface area of the co-culture  
511 channel (0.17cm<sup>2</sup>),  $Q_R$  is the fluid flow rate in the receiving channel in units of cm<sup>3</sup>/s,  $C_R$  is the  
512 concentration in the receiving channel in any consistent units, and  $C_D$  is the concentration in the  
513 dosing channel in any consistent units. As the recovery of all the compounds were greater than  
514 90%, the loss of mass due to non-specific cell binding or material absorption was considered

515 negligible (Error! Reference source not found.). Efflux ratios were then calculated by dividing the  
516 apparent permeability in the basal to apical direction by the apparent permeability in the apical to  
517 basal direction.

518 Inhibitor  $IC_{50}$  values were determined from victim compound efflux ratio data versus the  
519 corresponding inhibitor concentrations. A value of one was subtracted from all efflux ratios to  
520 express ratios in terms of transport above passive diffusion, which would be represented by an  
521 efflux ratio of one. These values were then normalized to the uninhibited efflux ratio for the victim-  
522 perpetrator combination, thereby expressing results as a percentage of the uninhibited active  
523 transport efflux ratio. This resulted in a dose-response curve with the uninhibited case represented  
524 by 100% transport and the completely inhibited case represented by 0%. The Hill Equation was  
525 then fit to the data to determine an  $IC_{50}$  for each perpetrator-inhibitor pairing at a victim dosing  
526 concentration of  $1\mu\text{M}$ .

## 527 Clearance Estimation

528 An estimation of renal clearance was made by following the classical equation (Russel *et al.*, 2002;  
529 Lee and Kim, 2004; Feng *et al.*, 2010; Morrissey *et al.*, 2013; El-Kattan and Varma, 2018):

530 Essentially, the equation sums the predicted contributions to clearance of glomerular filtration and  
531 proximal tubule active transport but neglects any possible distal tubule reabsorption,

$$CL_R = (CL_{GF} + CL_{PT,Sec})(1 - FR)$$

532 where  $CL_R$  denotes total renal clearance,  $CL_{GF}$  is clearance due to glomerular filtration alone,  
533  $CL_{PT,Sec}$  denotes clearance due to proximal tubule secretion or active transport, and  $FR$  denotes the  
534 fraction of compound reabsorbed in the distal tubule. The exclusion of the fraction reabsorbed  
535 term results in an upper estimate of renal clearance for compounds where reabsorption is

536 significant/appreciable. Reabsorption of xenobiotics in the distal tubule is driven by passive  
537 transport and tends toward an equilibrium between the unionized concentration in the filtrate and  
538 the unionized, non-protein bound fraction in the blood (Goodman *et al.*, 2011). Fraction reabsorbed  
539 was estimated assuming achievement of this equilibrium, based on physiologically relevant blood  
540 and glomerular filtrate acidity (pH) ranges, whether the compound were acids or bases, the acid  
541 dissociation constant (pKa) of the compound, and filtrate and blood flow rates (**Supplementary**  
542 **Figure 4**). Unless otherwise indicated, distal tubule reabsorption was insignificant and ignored.  
543 Clearance due to glomerular filtration was calculated as:

$$CL_{GF} = fu * GFR$$

544  
545 where *fu* denotes the fraction of compound unbound to plasma proteins and GFR is the  
546 Glomerular Filtration Rate (~120 mL/min in healthy young adults per 1.73 m<sup>2</sup> of body surface  
547 area). Clearance due to proximal tubule secretion was estimated using the general form:

$$CL_{sec} = \frac{Q_R * fu * CL_{int,T}}{Q_R + fu * CL_{int,T}}$$

548 where  $Q_R$  is the renal perfusion rate (~1200 mL/min in healthy adults per 1.73 m<sup>2</sup> body surface  
549 area) and  $CL_{int,T}$  is the intrinsic clearance due to proximal tubule transport. Intrinsic transport  
550 clearance was estimated as the fractional increase in compound concentration of the glomerular  
551 filtrate within the proximal tubule compared to initial glomerular filtrate concentration entering  
552 the proximal tubule, relative to the concentration of unbound compound in systemic circulation.  
553 Assuming equilibrium is achieved between active secretion transport and passive diffusion back  
554 into the blood stream, intrinsic transport clearance takes the form:

$$CL_{int,T} = GFR * \left( \frac{C_{GF, equi}}{C_{Sys, free}} - \frac{C_{GF, init}}{C_{Sys, free}} \right)$$

555

556 where  $C_{GF,equl}$  denotes the concentration of the molecule of interest in the proximal tubule  
557 glomerular filtrate at equilibrium,  $C_{Sys,free}$  denotes the concentration of free or unbound compound  
558 in the blood in systemic circulation,  $C_{GF,init}$  denotes the initial glomerular filtrate concentration or  
559 the concentration in the proximal tubule immediately following glomerular filtration (*see*  
560 **Supplementary Figure 4** for full information). Assuming the initial concentration of compound  
561 in the filtrate ( $C_{GF,init}$ ) is at equilibrium with the concentration of free compound in systemic  
562 circulation ( $C_{Sys,free}$ ) *in vivo* and substituting in the *in vitro* derived efflux for the ratio of the  
563 equilibrium concentration of compound in the filtrate ( $C_{GF,equl}$ ) versus the concentration of free  
564 compound in systemic circulation ( $C_{GF,equl}/C_{Sys,free}$ ), the equation simplifies to the form:

$$565 \quad CL_{int,T} = GFR * (EffluxRatio - 1)$$

566 See supplemental method for full derivation. Substrate/victim clearance values were calculated  
567 both in the presence and absence of inhibitor/perpetrator and compared directly with literature-  
568 reported values for total/systemic human clearance.

### 569 **Modeling Clinical Data**

570 A single-compartment clearance model was used to simulate the pharmacokinetics of all clinical  
571 studies analyzed and predict clinical study outcomes. Specifically, the model was used to predict  
572 shifts in clearance and area under the plasma concentration curve for the given dosing regimen of  
573 a victim-perpetrator versus dosing with only the victim/substrate. Model results were then  
574 compared to the reported clinical study results. Clinical data was pulled from the University of  
575 Washington Drug Interaction Database, with information regarding dosing regimen (dose mass,  
576 dosing interval, dosing duration) used as inputs to the predictive model. Other model inputs from  
577 *in vivo* data included either inhibitor concentration at steady-state ( $C_{ss}$ ) or inhibitor peak

578 concentration ( $C_{max}$ ), which were taken from the database, depending on whether inhibitor was  
579 administered as a series of doses or a single dose. The model also took as inputs the volume of  
580 distribution of the victim compound ( $V_{d,ss}$ ) and the fraction unbound to serum proteins ( $f_u$ ) for both  
581 victim and perpetrator, which were pulled from two databases (Goodman *et al.*, 2011; Lombardo  
582 *et al.*, 2018). Finally, the relationship between perpetrator concentration and victim efflux ratio  
583 was ascertained from the Kidney-Chip results, which directly corresponded to a change in victim  
584 clearance. Model predictions were compared to reported clinical outcomes from these studies.

#### 585 **Statistical analysis:**

586 Experiments were performed in triplicate for each sample per group. All error bars represent  
587 standard deviations of the mean, with errors propagated following standard practice. The  
588 statistical significance was calculated using student's t-test and a p-value of  $<0.05$  was  
589 considered to be statistically significant.

590 **Authorship contributions**

591 Participated in research design: Nookala, Luo, McKenzie, Hamilton, Jang

592 Conducted experiments: Nookala, He, Ronxhi, Jeanty, Jadalannagari, Park, Jang

593 Contributed new reagents or analytic tools:

594 Performed data analysis: Nookala, Ronxhi, Sliz, Manatakis, Jang

595 Wrote or contributed to the writing of the manuscript: Nookala, Sliz, Manatakis, Lavarias, Luo,

596 Ronxhi, Park, Jang

597 **Funding**

598 The authors received no external funding for this work.

599

600 **Competing interests**

601 Anantha Ram Nookala: Is a former employee of Labcorp Drug Development. Josiah Sliz,

602 Sauvear Jeanty, Dimitris V. Manatakis, Sushma Jadalannagari: Is a current employee of and hold

603 equity interests or options to obtain equity interests in (Emulate Inc). Janey Ronxhi, Geraldine

604 Hamilton, Hyounghsin Park, and Kyung-Jin Jang: Is a former employee of and hold equity

605 interests or options to obtain equity interests in (Emulate Inc). Yu He and Donald Mckenzie: Is a

606 current employee of and holds stock with Labcorp Drug Development. Mitchell Lavarias: Is a

607 current employee of Labcorp Drug Development. Gang Luo: Is a former employee of and holds

608 stock with Labcorp Drug Development.

609

## 610 **References**

- 611 Ashburner M, Ball CA, Blake JA, Botstein D, Butler H, Cherry JM, Davis AP, Dolinski K, Dwight SS,  
612 Eppig JT, Harris MA, Hill DP, Issel-Tarver L, Kasarskis A, Lewis S, Matese JC, Richardson JE,  
613 Ringwald M, Rubin GM, and Sherlock G (2000) Gene ontology: tool for the unification of  
614 biology. The Gene Ontology Consortium. *Nat Genet* **25**:25–29.
- 615 DesRochers TM, Suter L, Roth A, and Kaplan DL (2013) Bioengineered 3D human kidney tissue, a  
616 platform for the determination of nephrotoxicity. *PLoS One* **8**:e59219.
- 617 Duan Y, Gotoh N, Yan Q, Du Z, Weinstein AM, Wang T, and Weinbaum S (2008) Shear-induced  
618 reorganization of renal proximal tubule cell actin cytoskeleton and apical junctional complexes.  
619 *Proc Natl Acad Sci U S A* **105**:11418–11423.
- 620 El-Kattan AF, and Varma MVS (2018) Navigating Transporter Sciences in Pharmacokinetics  
621 Characterization Using the Extended Clearance Classification System. *Drug Metab Dispos Biol*  
622 *Fate Chem* **46**:729–739.
- 623 Feng B, LaPerle JL, Chang G, and Varma MVS (2010) Renal clearance in drug discovery and  
624 development: molecular descriptors, drug transporters and disease state. *Expert Opin Drug Metab*  
625 *Toxicol* **6**:939–952.
- 626 Fenster PE, Hager WD, and Goodman MM (1984) Digoxin-quinidine-spirolactone interaction. *Clin*  
627 *Pharmacol Ther* **36**:70–73.
- 628 Ferrell N, Ricci KB, Groszek J, Marmorstein JT, and Fissell WH (2012) Albumin handling by renal  
629 tubular epithelial cells in a microfluidic bioreactor. *Biotechnol Bioeng* **109**:797–803.
- 630 Ferrell N, Sandoval RM, Molitoris BA, Brakeman P, Roy S, and Fissell WH (2019) Application of  
631 physiological shear stress to renal tubular epithelial cells. *Methods Cell Biol* **153**:43–67.
- 632 Filipinski KK, Mathijssen RH, Mikkelsen TS, Schinkel AH, and Sparreboom A (2009) Contribution of  
633 organic cation transporter 2 (OCT2) to cisplatin-induced nephrotoxicity. *Clin Pharmacol Ther*  
634 **86**:396–402.
- 635 Goodman LS, Brunton LL, Chabner B, and Knollmann BC (eds) (2011) *Goodman & Gilman's*  
636 *pharmacological basis of therapeutics*, 12th ed, McGraw-Hill, New York.
- 637 Hager WD, Mayersohn M, and Graves PE (1981) Digoxin bioavailability during quinidine  
638 administration. *Clin Pharmacol Ther* **30**:594–599.
- 639 Heikkinen AT, Korjamo T, and Mönkkönen J (2010) Modelling of drug disposition kinetics in in vitro  
640 intestinal absorption cell models. *Basic Clin Pharmacol Toxicol* **106**:180–188.
- 641 Hoppensack A, Kazanecki CC, Colter D, Gosiewska A, Schanz J, Walles H, and Schenke-Layland K  
642 (2014) A human in vitro model that mimics the renal proximal tubule. *Tissue Eng Part C*  
643 *Methods* **20**:599–609.
- 644 Huang DW, Sherman BT, and Lempicki RA (2009a) Bioinformatics enrichment tools: paths toward the  
645 comprehensive functional analysis of large gene lists. *Nucleic Acids Res* **37**:1–13.

- 646 Huang DW, Sherman BT, and Lempicki RA (2009b) Systematic and integrative analysis of large gene  
647 lists using DAVID bioinformatics resources. *Nat Protoc* **4**:44–57.
- 648 Humes HD, MacKay SM, Funke AJ, and Buffington DA (1999) Tissue engineering of a bioartificial renal  
649 tubule assist device: in vitro transport and metabolic characteristics. *Kidney Int* **55**:2502–2514.
- 650 International Transporter Consortium, Giacomini KM, Huang S-M, Tweedie DJ, Benet LZ, Brouwer  
651 KLR, Chu X, Dahlin A, Evers R, Fischer V, Hillgren KM, Hoffmaster KA, Ishikawa T, Keppler  
652 D, Kim RB, Lee CA, Niemi M, Polli JW, Sugiyama Y, Swaan PW, Ware JA, Wright SH, Yee  
653 SW, Zamek-Gliszczynski MJ, and Zhang L (2010) Membrane transporters in drug development.  
654 *Nat Rev Drug Discov* **9**:215–236.
- 655 Ivanyuk A, Livio F, Biollaz J, and Buclin T (2017) Renal Drug Transporters and Drug Interactions. *Clin*  
656 *Pharmacokinet* **56**:825–892.
- 657 Jang K-J, Mehr AP, Hamilton GA, McPartlin LA, Chung S, Suh K-Y, and Ingber DE (2013) Human  
658 kidney proximal tubule-on-a-chip for drug transport and nephrotoxicity assessment. *Integr Biol*  
659 *Quant Biosci Nano Macro* **5**:1119–1129.
- 660 Jayagopal A, Brakeman PR, Soler P, Ferrell N, Fissell W, Kroetz DL, and Roy S (2019) Apical Shear  
661 Stress Enhanced Organic Cation Transport in Human OCT2/MATE1-Transfected Madin-Darby  
662 Canine Kidney Cells Involves Ciliary Sensing. *J Pharmacol Exp Ther* **369**:523–530.
- 663 Kanehisa M, and Goto S (2000) KEGG: kyoto encyclopedia of genes and genomes. *Nucleic Acids Res*  
664 **28**:27–30.
- 665 King SM, Higgins JW, Nino CR, Smith TR, Paffenroth EH, Fairbairn CE, Docuyanan A, Shah VD, Chen  
666 AE, Presnell SC, and Nguyen DG (2017) 3D Proximal Tubule Tissues Recapitulate Key Aspects  
667 of Renal Physiology to Enable Nephrotoxicity Testing. *Front Physiol* **8**:123.
- 668 Lee W, and Kim RB (2004) Transporters and renal drug elimination. *Annu Rev Pharmacol Toxicol*  
669 **44**:137–166.
- 670 Li Y, Kandasamy K, Chuah JKC, Lam YN, Toh WS, Oo ZY, and Zink D (2014) Identification of  
671 nephrotoxic compounds with embryonic stem-cell-derived human renal proximal tubular-like  
672 cells. *Mol Pharm* **11**:1982–1990.
- 673 Lombardo F, Berellini G, and Obach RS (2018) Trend Analysis of a Database of Intravenous  
674 Pharmacokinetic Parameters in Humans for 1352 Drug Compounds. *Drug Metab Dispos Biol*  
675 *Fate Chem* **46**:1466–1477.
- 676 Maeda K, Tian Y, Fujita T, Ikeda Y, Kumagai Y, Kondo T, Tanabe K, Nakayama H, Horita S, Kusuhara  
677 H, and Sugiyama Y (2014) Inhibitory effects of p-aminohippurate and probenecid on the renal  
678 clearance of adefovir and benzylpenicillin as probe drugs for organic anion transporter (OAT) 1  
679 and OAT3 in humans. *Eur J Pharm Sci Off J Eur Fed Pharm Sci* **59**:94–103.
- 680 Maggiorani D, Dissard R, Belloy M, Saulnier-Blache J-S, Casemayou A, Ducasse L, Grès S, Bellière J,  
681 Caubet C, Bascands J-L, Schanstra JP, and Buffin-Meyer B (2015) Shear Stress-Induced  
682 Alteration of Epithelial Organization in Human Renal Tubular Cells. *PLoS One* **10**:e0131416.



- 683 Masereeuw R, and Russel FGM (2012) Regulatory pathways for ATP-binding cassette transport proteins  
684 in kidney proximal tubules. *AAPS J* **14**:883–894.
- 685 Mathialagan S, Piotrowski MA, Tess DA, Feng B, Litchfield J, and Varma MV (2017) Quantitative  
686 Prediction of Human Renal Clearance and Drug-Drug Interactions of Organic Anion Transporter  
687 Substrates Using In Vitro Transport Data: A Relative Activity Factor Approach. *Drug Metab*  
688 *Dispos Biol Fate Chem* **45**:409–417.
- 689 Merlot AM, Kalinowski DS, and Richardson DR (2014) Unraveling the mysteries of serum albumin—more  
690 than just a serum protein. *Front Physiol* **5**:299.
- 691 Morrissey KM, Stocker SL, Wittwer MB, Xu L, and Giacomini KM (2013) Renal transporters in drug  
692 development. *Annu Rev Pharmacol Toxicol* **53**:503–529.
- 693 Müller F, Weitz D, Mertsch K, König J, and Fromm MF (2018) Importance of OCT2 and MATE1 for the  
694 Cimetidine-Metformin Interaction: Insights from Investigations of Polarized Transport in Single-  
695 And Double-Transfected MDCK Cells with a Focus on Perpetrator Disposition. *Mol Pharm*  
696 **15**:3425–3433.
- 697 Naughton CA (2008) Drug-induced nephrotoxicity. *Am Fam Physician* **78**:743–750.
- 698 Nielsen R, Christensen EI, and Birn H (2016) Megalin and cubilin in proximal tubule protein  
699 reabsorption: from experimental models to human disease. *Kidney Int* **89**:58–67.
- 700 Nieskens TTG, and Sjögren A-K (2019) Emerging In Vitro Systems to Screen and Predict Drug-Induced  
701 Kidney Toxicity. *Semin Nephrol* **39**:215–226.
- 702 Nigam SK, Wu W, Bush KT, Hoenig MP, Blantz RC, and Bhatnagar V (2015) Handling of Drugs,  
703 Metabolites, and Uremic Toxins by Kidney Proximal Tubule Drug Transporters. *Clin J Am Soc*  
704 *Nephrol CJASN* **10**:2039–2049.
- 705 Ochs HR, Bodem G, and Greenblatt DJ (1981) Impairment of digoxin clearance by coadministration of  
706 quinidine. *J Clin Pharmacol* **21**:396–400.
- 707 Pazour GJ, and Witman GB (2003) The vertebrate primary cilium is a sensory organelle. *Curr Opin Cell*  
708 *Biol* **15**:105–110.
- 709 Raghavan V, Rbaibi Y, Pastor-Soler NM, Carattino MD, and Weisz OA (2014) Shear stress-dependent  
710 regulation of apical endocytosis in renal proximal tubule cells mediated by primary cilia. *Proc*  
711 *Natl Acad Sci U S A* **111**:8506–8511.
- 712 Rameis H (1985) Quinidine-digoxin interaction: are the pharmacokinetics of both drugs altered? *Int J*  
713 *Clin Pharmacol* **23**:145–153.
- 714 Rebelo L, Carmo-Fonseca M, and Moura TF (1992) Redistribution of microvilli and membrane enzymes  
715 in isolated rat proximal tubule cells. *Biol Cell* **74**:203–209.
- 716 Russel FGM, Masereeuw R, and van Aubel RAMH (2002) Molecular aspects of renal anionic drug  
717 transport. *Annu Rev Physiol* **64**:563–594.

- 718 Scotcher D, Jones C, Posada M, Galetin A, and Rostami-Hodjegan A (2016) Key to Opening Kidney for  
719 In Vitro-In Vivo Extrapolation Entrance in Health and Disease: Part II: Mechanistic Models and  
720 In Vitro-In Vivo Extrapolation. *AAPS J* **18**:1082–1094.
- 721 Snouber LC, Letourneur F, Chafey P, Broussard C, Monge M, Legallais C, and Leclerc E (2012)  
722 Analysis of transcriptomic and proteomic profiles demonstrates improved Madin-Darby canine  
723 kidney cell function in a renal microfluidic biochip. *Biotechnol Prog* **28**:474–484.
- 724 Somogyi A, Stockley C, Keal J, Rolan P, and Bochner F (1987) Reduction of metformin renal tubular  
725 secretion by cimetidine in man. *Br J Clin Pharmacol* **23**:545–551.
- 726 Tiong HY, Huang P, Xiong S, Li Y, Vathsala A, and Zink D (2014) Drug-induced nephrotoxicity: clinical  
727 impact and preclinical in vitro models. *Mol Pharm* **11**:1933–1948.
- 728 Tran TT, Mittal A, Gales T, Maleeff B, Aldinger T, Polli JW, Ayrton A, Ellens H, and Bentz J (2004)  
729 Exact kinetic analysis of passive transport across a polarized confluent MDCK cell monolayer  
730 modeled as a single barrier. *J Pharm Sci* **93**:2108–2123.
- 731 Van der Hauwaert C, Savary G, Buob D, Leroy X, Aubert S, Flamand V, Hennino M-F, Perrais M, Lo-  
732 Guidice J-M, Broly F, Cauffiez C, and Glowacki F (2014) Expression profiles of genes involved  
733 in xenobiotic metabolism and disposition in human renal tissues and renal cell models. *Toxicol*  
734 *Appl Pharmacol* **279**:409–418.
- 735 Vormann MK, Gijzen L, Hutter S, Boot L, Nicolas A, van den Heuvel A, Vriend J, Ng CP, Nieskens  
736 TTG, van Duinen V, de Wagenaar B, Masereeuw R, Suter-Dick L, Trietsch SJ, Wilmer M, Joore  
737 J, Vulto P, and Lanz HL (2018) Nephrotoxicity and Kidney Transport Assessment on 3D  
738 Perfused Proximal Tubules. *AAPS J* **20**:90.
- 739 Vriend J, Peters JGP, Nieskens TTG, Škvroňová R, Blaimschein N, Schmidts M, Roepman R, Schirris  
740 TJJ, Russel FGM, Masereeuw R, and Wilmer MJ (2020) Flow stimulates drug transport in a  
741 human kidney proximal tubule-on-a-chip independent of primary cilia. *Biochim Biophys Acta*  
742 *Gen Subj* **1864**:129433.
- 743 Wang T, Weinbaum S, and Weinstein AM (2017) Regulation of glomerulotubular balance: flow-activated  
744 proximal tubule function. *Pflugers Arch* **469**:643–654.
- 745 Wang Z-J, Yin OQP, Tomlinson B, and Chow MSS (2008) OCT2 polymorphisms and in-vivo renal  
746 functional consequence: studies with metformin and cimetidine. *Pharmacogenet Genomics*  
747 **18**:637–645.
- 748 Weber EJ, Chapron A, Chapron BD, Voellinger JL, Lidberg KA, Yeung CK, Wang Z, Yamaura Y,  
749 Hailey DW, Neumann T, Shen DD, Thummel KE, Muczynski KA, Himmelfarb J, and Kelly EJ  
750 (2016) Development of a microphysiological model of human kidney proximal tubule function.  
751 *Kidney Int* **90**:627–637.
- 752 Wieser M, Stadler G, Jennings P, Streubel B, Pfaller W, Ambros P, Riedl C, Katinger H, Grillari J, and  
753 Grillari-Voglauer R (2008) hTERT alone immortalizes epithelial cells of renal proximal tubules  
754 without changing their functional characteristics. *Am J Physiol Renal Physiol* **295**:F1365-1375.
- 755 Wilmer MJ, Ng CP, Lanz HL, Vulto P, Suter-Dick L, and Masereeuw R (2016) Kidney-on-a-Chip  
756 Technology for Drug-Induced Nephrotoxicity Screening. *Trends Biotechnol* **34**:156–170.

757 Wilmer MJ, Saleem MA, Masereeuw R, Ni L, van der Velden TJ, Russel FG, Mathieson PW, Monnens  
758 LA, van den Heuvel LP, and Levitchenko EN (2010) Novel conditionally immortalized human  
759 proximal tubule cell line expressing functional influx and efflux transporters. *Cell Tissue Res*  
760 **339**:449–457.

761 Yin J, and Wang J (2016) Renal drug transporters and their significance in drug-drug interactions. *Acta*  
762 *Pharm Sin B* **6**:363–373.

763 Zhai XY, Nielsen R, Birn H, Drumm K, Mildenerger S, Freudinger R, Moestrup SK, Verroust PJ,  
764 Christensen EI, and Gekle M (2000) Cubilin- and megalin-mediated uptake of albumin in  
765 cultured proximal tubule cells of opossum kidney. *Kidney Int* **58**:1523–1533.

766 Zhu Y, Meng Q, Wang C, Liu Q, Sun H, Kaku T, and Liu K (2012) Organic anion transporters involved  
767 in the excretion of bestatin in the kidney. *Peptides* **33**:265–271.

768

769

770

771

772 **Figure Legends**

773 **Figure 1: Development and characterization of human Proximal Tubule Kidney-Chip:** (A)

774 Cross-section of Kidney-Chip that emulates the structure of the proximal tubule. Proximal tubular  
775 epithelial cells are grown in the top channel and renal microvascular endothelial cells are grown  
776 in the bottom channel, separated by an extracellular matrix coated porous membrane. (B)  
777 Characterization of the proximal tubule epithelial and endothelial cells. Presence of aquaporin-1  
778 and Na<sup>+</sup>/K<sup>+</sup>-ATPase transporters in proximal tubule epithelial cells are indicated by the green  
779 fluorescence and red fluorescence, respectively. Confluency and tight junctions of the endothelial  
780 cells are indicated by the uniform green staining of VE-cadherin with blue staining nucleus  
781 (Hoechst). Bright field (BF) images of epithelium and endothelium on Kidney-Chip after 14 days  
782 of culture under flow.

783 **Figure 2: Comparison of Kidney-Chip and transwell transcriptomics data after 14 days in**

784 **culture:** (A) The volcano plot resulted by the DGE analysis between Kidney-Chip and  
785 conventional transwell cultures (n=4 samples per group). For the selection of the DE genes we  
786 used the following thresholds: adjusted p-value < 0.01 and |Log<sub>2</sub> (FoldChange)| > 1.6. The  
787 identified up- and down- regulated genes are highlighted in cyan and magenta color, respectively.  
788 (B) List of biological processes identified by KEGG pathway and Gene Ontology (GO) enrichment  
789 analysis using the up-regulated genes resulted by the differentially gene expression analysis  
790 between Kidney-Chip and conventional transwell cultures. (C) Heatmap was generated to examine  
791 particular genes of efflux transporters including MDR1, MRP1, MRP2, MRP3, MRP4, MRP6 and  
792 uptake transporters including OAT1, OAT2, OAT3, OAT4, OATP4A1, OATP4C1, OCT2,  
793 OCTN1, OCTN2, MATE1, and MATE2K between Kidney-Chip and transwell cultures.

794 **Figure 3: Comparison of the transporter activity on Kidney-Chip versus transwell after 14**  
795 **days in culture:** (A) Schematic of the location and transport direction of apical (MATE1, MATE-  
796 2K, and P-gp) and basolateral transporters (OAT1, OAT3, and OCT2). (B) Apparent  
797 permeabilities ( $P_{app}$ ) for various probe substrates, including digoxin (P-gp), metformin (MATEs  
798 and OCT2), tetraethyl ammonium (OCT2), and p-amino hippuric acid (OAT1) are presented.  
799 Apparent permeability from A to B and B to A directions are represented in gray and black solid  
800 bars, respectively. (C) Efflux ratios of the probe substrates are presented for Kidney-Chip and  
801 transwell by gray and white solid bars, respectively ( $n = 3$  independent chips). Statistical analyses  
802 were performed by Student's *t*-test and \*\* denotes *P*-value of  $\leq 0.01$ .

803 **Figure 4: Comparison of *in vitro* predicted clearance values to *in vivo*:** Clearance (mL/min)  
804 was calculated for adefovir, digoxin, metformin, p-amino hippuric acid, and tetra ethyl ammonium  
805 using data obtained from Kidney-Chip and transwell and was compared against the *in vivo* values  
806 observed in human subjects. Kidney-Chip, transwell, and human *in vivo* clearance values are  
807 represented by gray, white, and black solid bars, respectively.

808 **Figure 5: Utilizing Kidney-Chip to study various renal transporter mediated drug-drug**  
809 **interactions:** RPTECs and RMVECs were cultured on Kidney-Chip for 8 to 14 days under a flow  
810 rate of 60  $\mu$ L/hr. Various concentrations of solvent control or inhibitor solutions were added to the  
811 top and bottom channels 1 hour prior to the addition of the probe substrates and incubated for 3  
812 hours. Different substrate-inhibitor combinations included were (A) Digoxin-quinidine, (B) TEA-  
813 cimetidine, (C) Metformin-cimetidine, (D) PAH-probenecid, and (E) Adefovir-probenecid.  
814 Apparent permeability ( $P_{app}$ ) from A to B and B to A directions are represented by solid line and  
815 dashed line, respectively. Efflux ratios of each substrate at different inhibitor concentrations are

816 presented in a bar graph. Percent of uninhibited active efflux ratio against inhibitor concentrations  
817 was plotted and the corresponding  $IC_{50}$  values were calculated (n = 3 independent chips).

818 **Figure 6: Simulation of clinical drug-drug interactions using Kidney-Chip:** Simulation of  
819 plasma concentration-time profiles of (A) Digoxin-quinidine, (B) Metformin-cimetidine, and (C)  
820 Adefovir-probenecid. Solid lines and dashed lines represent clearance in the absence and presence  
821 of inhibitor, respectively.

**Table 1: Summary of apparent permeability, efflux ratio, and clearance values calculated using Kidney-Chip and transwell**

| Substrate | Transwell Efflux Ratio | Kidney-Chip Efflux Ratio | Total in vivo Clearance (mL/min) | Transwell Predicted Clearance |              | Kidney-Chip Predicted Clearance |              | Distal Tubule Reabsorption |
|-----------|------------------------|--------------------------|----------------------------------|-------------------------------|--------------|---------------------------------|--------------|----------------------------|
|           |                        |                          |                                  | mL/min                        | % of in vivo | mL/min                          | % of in vivo |                            |
| Adefovir  | -                      | 2.01+/-0.11              | 259 ± 0.61                       | -                             |              | 221 ± 13                        | 85           | Minimal                    |
| Digoxin   | 2.28+/-0.38            | 8.34+/-0.83              | 119                              | 195 ± 33                      | 164          | 516 ± 70                        | 434          | Significant                |
| Metformin | 1.12+/-0.12            | 3.26+/-0.41              | 533 ± 21                         | 134 ± 14                      | 25           | 341 ± 47                        | 64           | Minimal                    |
| PAH       | 1.37+/-0.20            | 4.84+/-0.57              | 540                              | 135 ± 20                      | 25           | 390 ± 54                        | 72           | Minimal                    |
| TEA       | 1.11+/-0.06            | 6.95+/-0.60              | Unavailable                      | 133 ± 7.2                     |              | 568 ± 68                        |              | -                          |

**Table 2: Summary of Kidney-Chip predicted clinical impact to actual clinical impact on AUC and Cmax**

| Implicated Transporter Family | Perpetrator | Victim    | Clinical Impact                   | Predicted Clinical Impact              |
|-------------------------------|-------------|-----------|-----------------------------------|----------------------------------------|
| P-gp                          | Quinidine   | Digoxin   | Cl <sub>r</sub> ↓54%<br>AUC ↑166% | Cl <sub>r</sub> ↓59%<br>AUC ↑128%      |
| OCT/MATE                      | Cimetidine  | Metformin | Cl <sub>r</sub> ↓27%<br>AUC ↑50%  | Cl <sub>r</sub> ↓20-38%<br>AUC ↑26-60% |
| OAT                           | Probenecid  | Adefovir  | Not Reported<br>AUC ↑82%          | Cl <sub>r</sub> ↓39%<br>AUC ↑64%       |



**Figure 1**

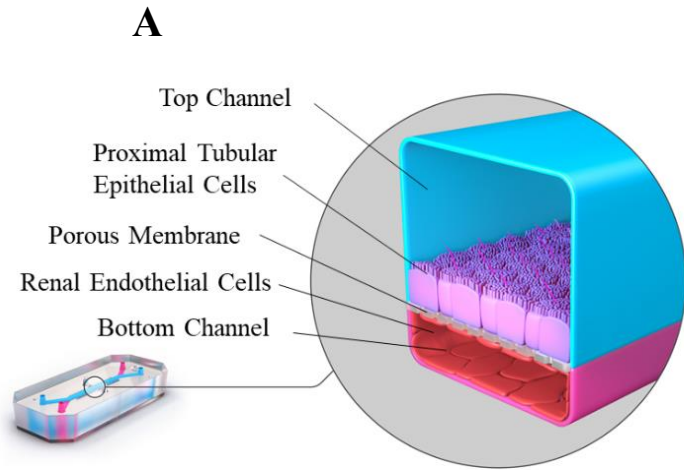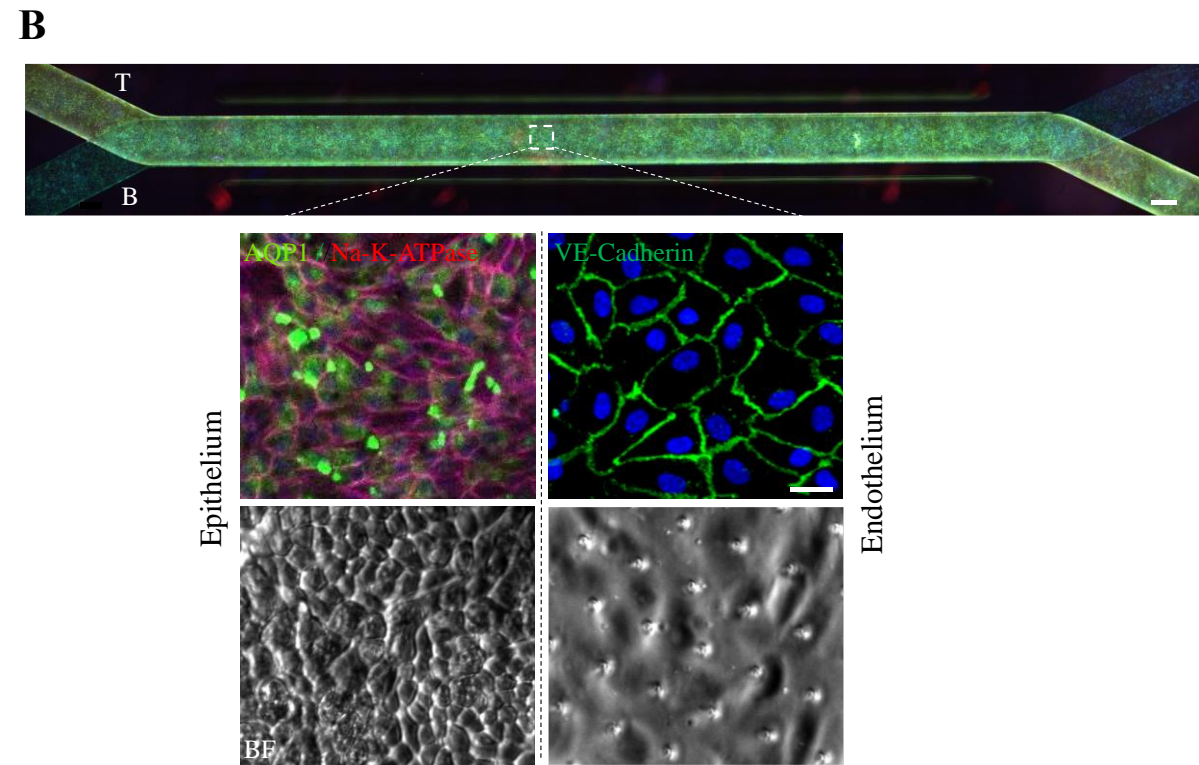

**Figure 2**

**A** Kidney-Chip vs Transwells

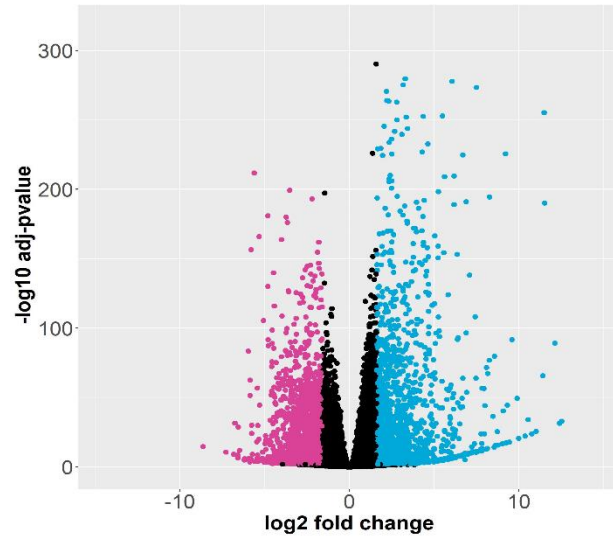

**B**

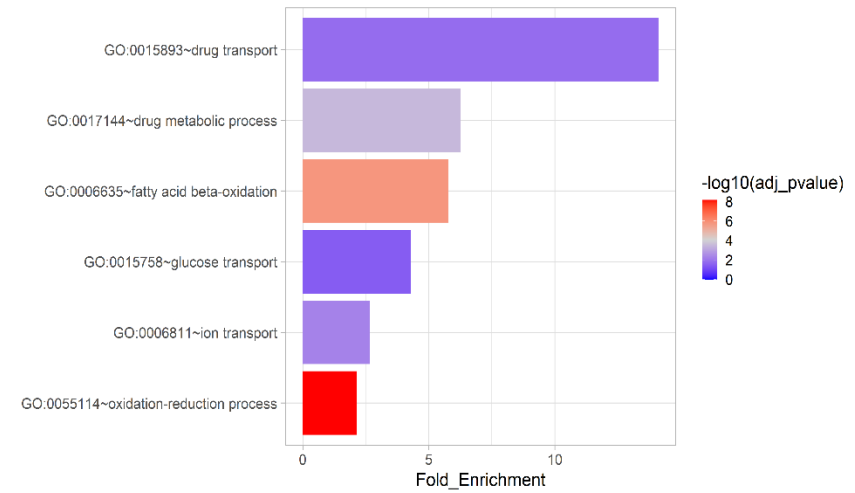

**C**

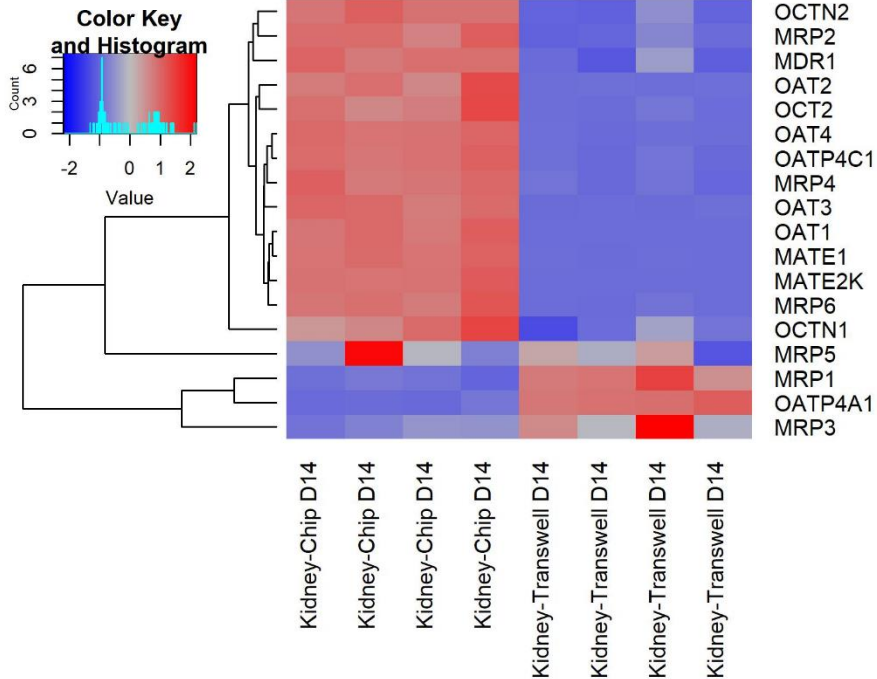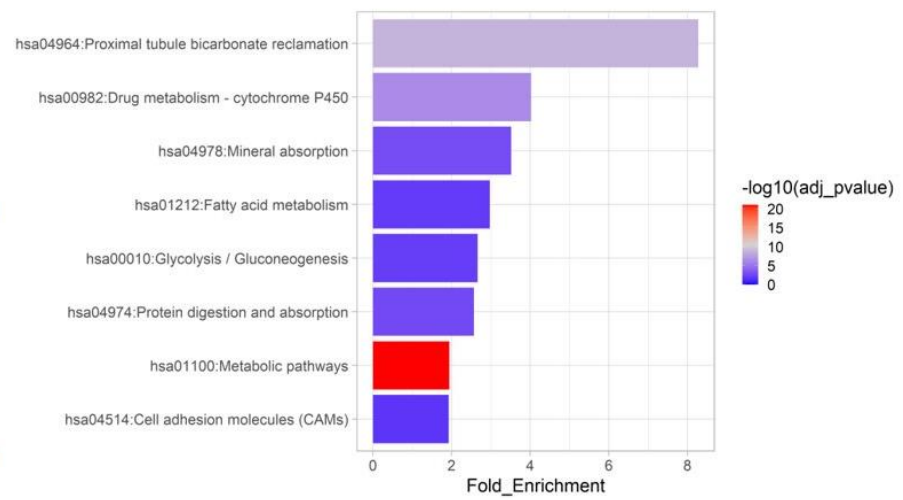

**Figure 3**

**A**

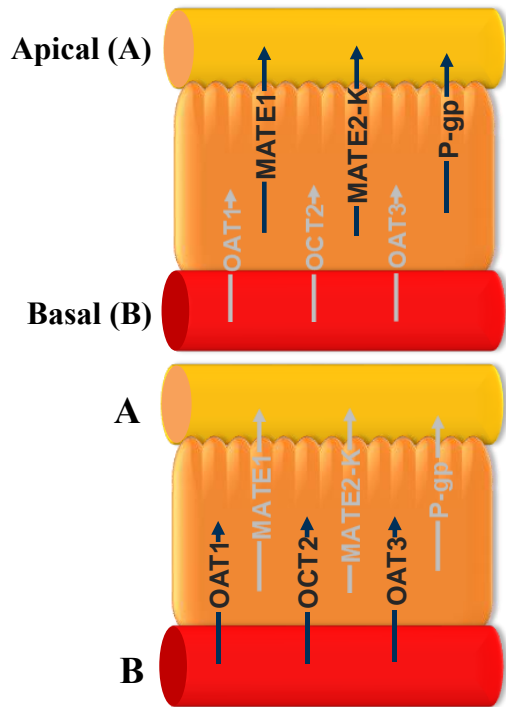

**B**

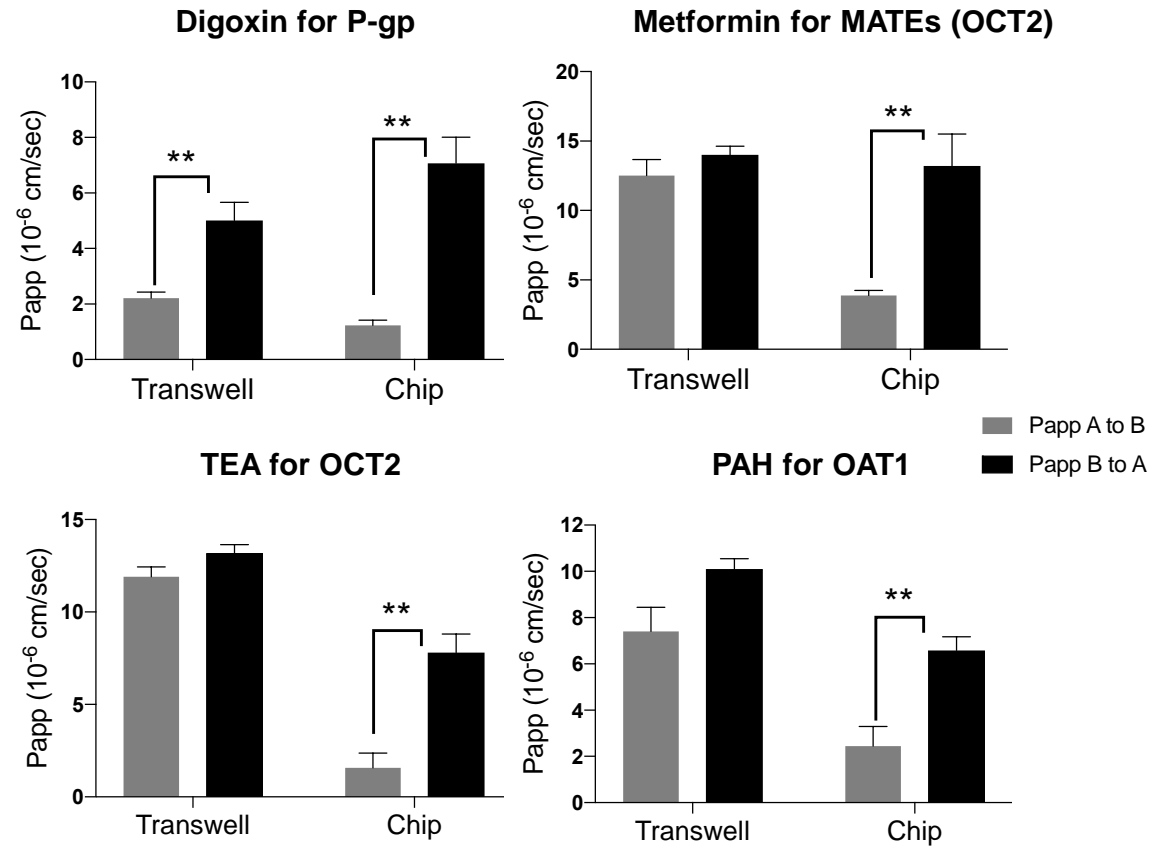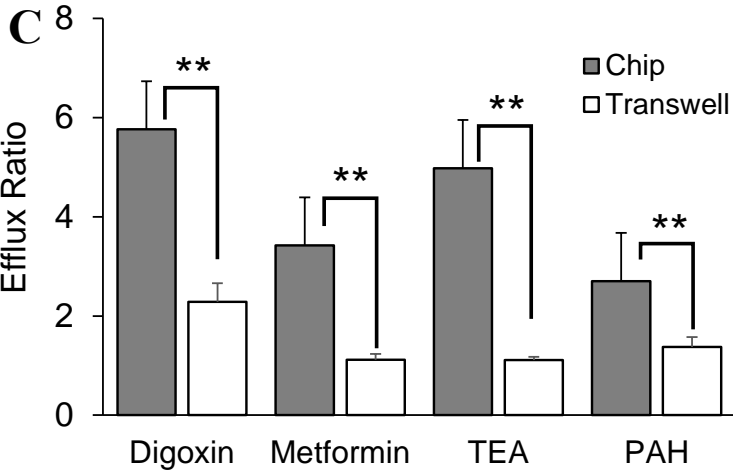

**Figure 4**

**A**

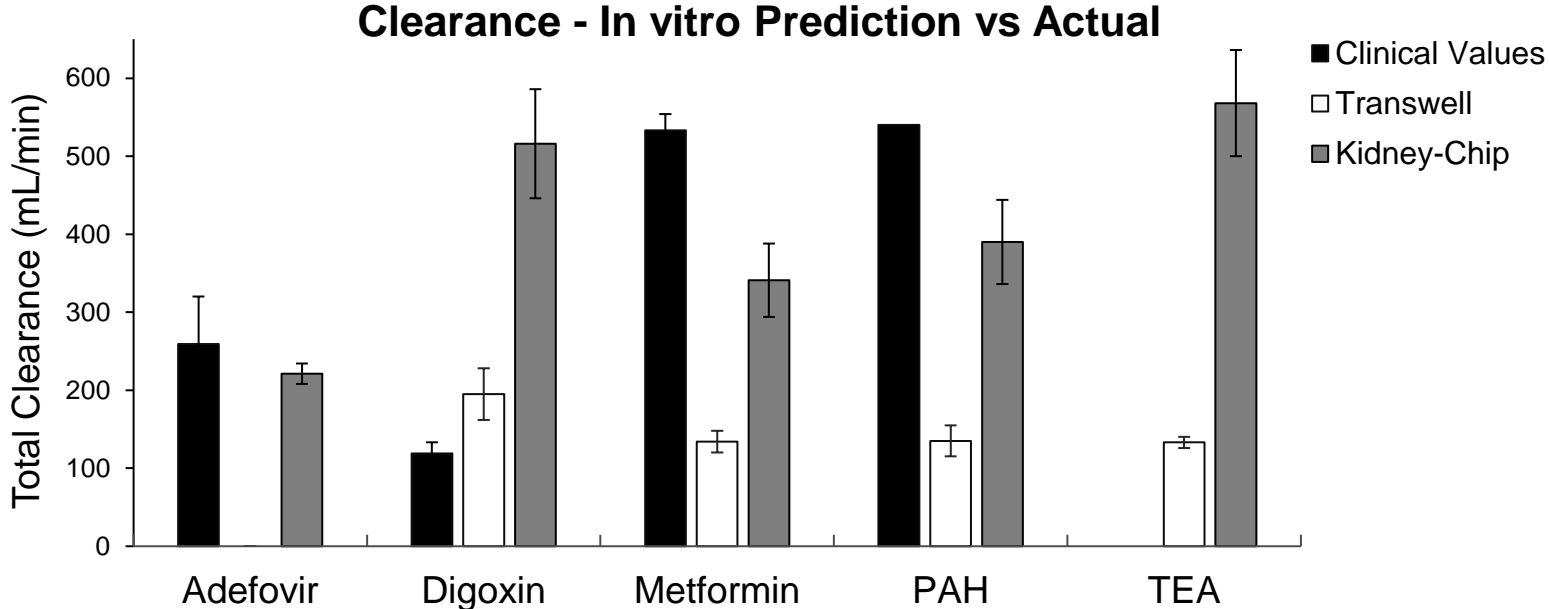

**Figure 5**

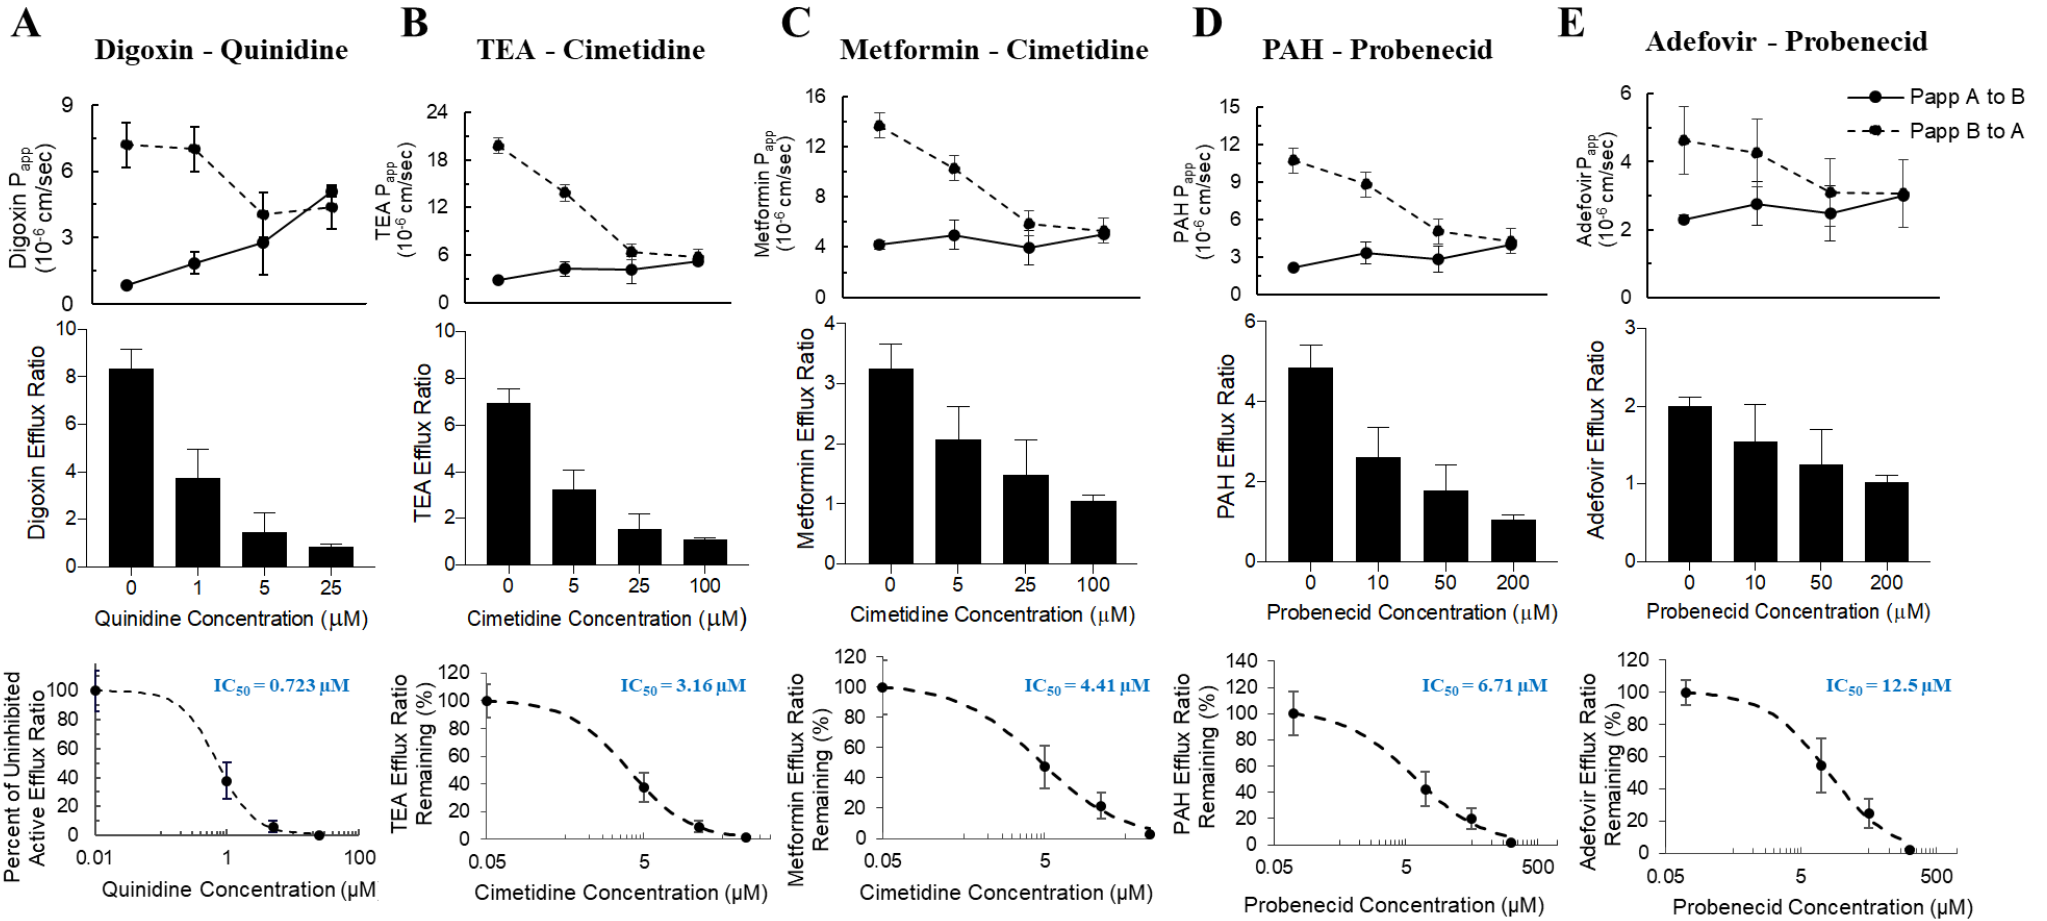

1 **Figure 6**

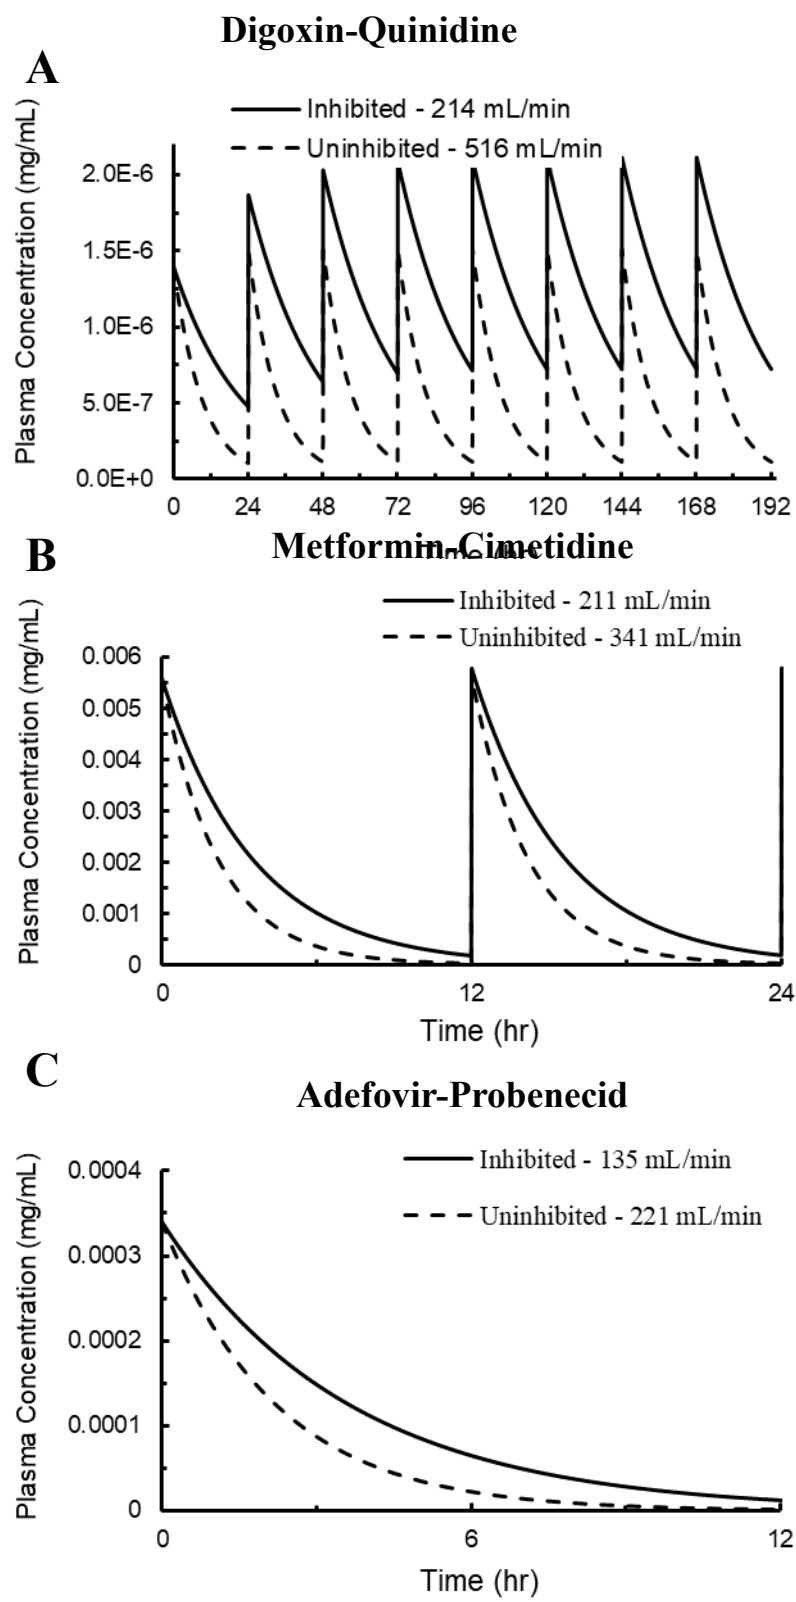

Source: https://www.biorxiv.org/content/biorxiv/early/2022/05/13/2022.05.12.491717.full.pdf
